1 **Inflammation in Alzheimer’s disease: do sex and APOE matter?**

2

3 Paula Duarte-Guterman<sup>1</sup>, Arianne Y. Albert<sup>2</sup>, Amy M. Inkster<sup>3,4</sup>, Cindy K. Barha<sup>5</sup>, Liisa A.M.

4 Galea<sup>1</sup>, on behalf of the Alzheimer’s Disease Neuroimaging Initiative<sup>δ</sup>

5

6 1. Djavad Mowafaghian Centre for Brain Health and Department of Psychology, University of

7 British Columbia, Vancouver, BC, Canada

8 2. Women's Health Research Institute of British Columbia, Vancouver, BC, Canada

9 3. Department of Medical Genetics, University of British Columbia, Vancouver, BC, Canada.

10 4. BC Children’s Hospital Research Institute, Vancouver, BC, Canada

11 5. Djavad Mowafaghian Centre for Brain Health and Department of Physical Therapy,

12 University of British Columbia, Vancouver, BC, Canada

13

14 Address all correspondence and requests for reprints to:

15 L. A. M. Galea, PhD

16 Djavad Mowafaghian Centre for Brain Health

17 2215 Wesbrook Mall

18 Vancouver, British Columbia

19 V6T 1Z3, Canada

20 E-mail: [lgalea@psych.ubc.ca](mailto:lgalea@psych.ubc.ca).

21

22

23

24 <sup>δ</sup> Data used in preparation of this article were obtained from the Alzheimer’s Disease  
25 Neuroimaging Initiative (ADNI) database ([adni.loni.usc.edu](http://adni.loni.usc.edu)). As such, the investigators within  
26 the ADNI contributed to the design and implementation of ADNI and/or provided data but did  
27 not participate in analysis or writing of this report. A complete listing of ADNI investigators can  
28 be found at: [http://adni.loni.usc.edu/wp-](http://adni.loni.usc.edu/wp-content/uploads/how_to_apply/ADNI_Acknowledgement_List.pdf)  
29 [content/uploads/how\\_to\\_apply/ADNI\\_Acknowledgement\\_List.pdf](http://adni.loni.usc.edu/wp-content/uploads/how_to_apply/ADNI_Acknowledgement_List.pdf)

30

31

32 **Running title:** Inflammation in AD

33

34 **ABSTRACT**

35 Alzheimer's disease (AD) disproportionately affects females with steeper cognitive  
36 decline and more neuropathology compared to males, which is exacerbated in females carrying  
37 the APOE $\epsilon$ 4 allele. The risk of developing AD is also higher in female APOE $\epsilon$ 4 carriers in  
38 earlier age groups (aged 65-75), and the progression from cognitively normal to mild cognitive  
39 impairment (MCI) and to AD may be influenced by sex. Inflammation is observed in AD and is  
40 related to aging, stress, and neuroplasticity, and although studies are scarce, sex differences are  
41 noted in inflammation. The objective of this study was to investigate underlying physiological  
42 inflammatory mechanisms that may help explain why there are sex differences in AD and  
43 APOE $\epsilon$ 4 carriers. We investigated, using the ADNI database, the effect of sex and APOE  
44 genotype (non-carriers or carriers of 1 and 2 APOE $\epsilon$ 4 alleles) and sex and diagnosis (cognitively  
45 normal (CN), MCI, AD) on CSF (N= 279) and plasma (N= 527) markers of stress and  
46 inflammation. We found CSF IL-16 and IL-8 levels were significantly lower in female non-  
47 carriers of APOE $\epsilon$ 4 alleles compared to males, whereas levels were similar between the sexes  
48 among carriers of APOE $\epsilon$ 4 alleles. Furthermore, females had on average higher levels of plasma  
49 CRP and ICAM1 but lower levels of CSF ICAM1, IL-8, IL-16, and IgA than males. Carrying  
50 APOE $\epsilon$ 4 alleles and diagnosis (MCI and AD) decreased plasma CRP in both sexes. Sex  
51 differences in inflammatory biomarkers support that the underlying physiological changes during  
52 aging differ by sex and tissue origin.

53

54 **Keywords:** Sex differences; Alzheimer's disease; APOE genotype; inflammation; cytokines.

55

56

57 **INTRODUCTION**

58 Alzheimer's disease (AD) is a neurodegenerative disease characterized by severe  
59 cognitive decline [1]. Risk factors for AD include modifiable risk factors such as sociocultural or  
60 lifestyle factors (e.g., education, marital status, exercise), chronic stress exposure [2], and  
61 medical conditions (diabetes, obesity, and cardiovascular disease) [3–5]. Non-modifiable lifetime  
62 risk factors for AD include age, female sex, and APOE genotype [6]. However, research on the  
63 effects of biological sex on risk for AD is equivocal and may depend on geographic location  
64 (reviewed in [4,7,8]). Nevertheless, females with AD show greater cognitive decline [9–11] and  
65 neuropathology compared to males (faster brain atrophy rates, neurofibrillary tangles; [10,12–  
66 15]). Intriguingly, the presence of APOE $\epsilon$ 4 alleles increases the risk to develop AD in females  
67 compared to males at an earlier age (aged 65-75; [16]), and accelerates neuropathology and  
68 cognitive decline more so in females than in males [10,11,14,17–19], indicating that the APOE  
69 genotype interacts with sex on various factors related to AD. However, there is limited research  
70 into the role of sex and its interaction with APOE genotype in the possible mechanisms  
71 underlying AD. Understanding why females in general and female APOE $\epsilon$ 4 carriers have a  
72 higher burden of the disease is important for the development of tailored treatments. Biomarkers  
73 are highly sought after to predict disease onset and progression and to understand the underlying  
74 mechanisms of diseases in order to develop or improve treatments.

75 Chronic low grade inflammation is a hallmark of AD, as evidenced by increased  
76 expression of proinflammatory cytokines in the brains of AD patients (not analyzed by sex),  
77 which can exacerbate AD pathology [20–22]. There is, however, increasing evidence that there  
78 are sex differences in immune responses in healthy adults with females mounting a stronger  
79 response compared to males after an acute challenge [23,24]. In response to an endotoxin,  
80 females have higher levels of pro-inflammatory plasma cytokines (TNF- $\alpha$  and IL-6) while males

81 have higher plasma levels of anti-inflammatory IL-10 [23,25]. In addition, aging affects the  
82 immune system differently in males and females, with females having higher genomic activity  
83 for adaptive cells and males having activity for monocytes and inflammation [26]. Although  
84 limited, there is evidence that sex differences in systemic inflammation are associated with  
85 greater AD pathology [27] but not cognitive decline in normal aging [28]. Specifically, higher C-  
86 reactive protein (CRP) levels in blood beginning in midlife are associated with higher brain  
87 amyloid levels later in life in healthy males, but not in healthy females [27]. To our knowledge,  
88 very few studies have stratified by sex and APOE genotype or sex and diagnosis of cognitive  
89 status on potential biomarkers of AD, including inflammation.

90 Sex differences in inflammatory biomarker systems may also differentially affect  
91 neuroplasticity [29,30], which is reduced in AD and correlates with cognitive decline [31,32]. In  
92 addition, peripheral cortisol, the main stress hormone in humans, is elevated in AD [33] and is  
93 associated with higher amyloid levels in the brain [34], a reduction in hippocampal volume, and  
94 cognitive impairment in older individuals [35] that may depend on MCI status [36]. Peripheral  
95 cortisol is also associated with elevated pro-inflammatory cytokines [23,37]. However, it is not  
96 known how sex differences in markers of inflammation (e.g., cytokines, immunoglobulins, CRP,  
97 intercellular adhesion molecule, ICAM1), and stress hormones (cortisol) may be related to sex  
98 differences in AD.

99 Using the ADNI database, we conducted exploratory analyses examining sex differences  
100 in CSF and plasma physiological biomarkers, inflammation and stress related, and how these  
101 may be affected by APOE genotype (non-carriers or carriers of APOE $\epsilon$ 4 alleles), and dementia  
102 status (cognitively healthy (CN), MCI, AD). We tested the hypothesis that females have higher

103 levels of inflammation and stress hormones compared to males and these levels are  
104 disproportionately affected by the presence of APOE $\epsilon$ 4 alleles and AD diagnosis.

105

## 106 **METHODS**

### 107 *ADNI database*

108 Data used in the preparation of this article were obtained from the Alzheimer's Disease  
109 Neuroimaging Initiative (ADNI) database ([adni.loni.usc.edu](http://adni.loni.usc.edu)). The ADNI was launched in  
110 2003 as a public-private partnership, led by Principal Investigator Michael W. Weiner,  
111 MD. The primary goal of ADNI has been to test whether serial magnetic resonance imaging  
112 (MRI), positron emission tomography (PET), other biological markers, and clinical and  
113 neuropsychological assessment can be combined to measure the progression of mild cognitive  
114 impairment (MCI) and early Alzheimer's disease (AD). For up-to-date information, see  
115 [www.adni-info.org](http://www.adni-info.org). Data used in this article were downloaded on or before Jan 16, 2019.  
116 Inclusion and exclusion criteria of participants [38,39] were the same for the two datasets  
117 analysed in the current study (biomarkers in CSF and plasma), and general procedures are  
118 detailed online (<http://adni.loni.usc.edu/methods/documents/>). Briefly, cognitively normal (CN)  
119 participants had normal memory function based on education-adjusted scores on the Wechsler  
120 Memory Scale Logical Memory II and a Clinical Dementia Rating (CDR) of 0. Amnesic late  
121 MCI (LMCI) participants had objective memory loss (measured by education-adjusted scores  
122 from Wechsler Memory Scale Logical Memory II), a CDR of 0.5, preserved daily activities, and  
123 absence of dementia. All AD participants met NINCDS/ADRDA Alzheimer's Criteria and a  
124 CDR of 0.5 or 1.0.

125 To address our research questions, we used two separate datasets from the ADNI  
126 database: CSF biomarkers and plasma biomarkers (Table 1). Although the datasets do not

127 overlap completely, within the plasma-CSF datasets there is an overlap of 85% (i.e., 85% of  
128 individuals with CSF biomarker data also had plasma levels of biomarkers). This is an  
129 exploratory study of these variables on sex by APOE genotype and sex by diagnosis and we  
130 discuss the limitation of these overlapping datasets below.

131

### 132 *Statistical Methods: Inflammatory markers*

133 We included all ADNI participants that had inflammatory markers measured in CSF (N =  
134 279) and plasma (N = 527) listed in Tables 1. Data included in our analyses were: demographics  
135 (age, years of education, and ethnicity), baseline diagnosis (cognitively normal, CN; late MCI,  
136 LMCI; or AD), and number of APOE $\epsilon$ 4 alleles. We collapsed APOE genotype into two groups:  
137 (1) participants carrying any  $\epsilon$ 4 alleles (homozygous  $\epsilon$ 4/ $\epsilon$ 4 and heterozygous  $\epsilon$ 4/-) and (2)  
138 participants with no  $\epsilon$ 4 risk alleles (-/-). Plasma and CSF samples from the ADNI study were  
139 collected in CN, LMCI, and AD participants at baseline in the morning after an overnight fast.  
140 Processing, aliquoting and storage were performed according to the ADNI Biomarker Core  
141 Laboratory Standard Operating Procedures. Inflammatory markers were measured using a  
142 commercially available multiplex proteomic panel (Human Discovery Multi-Analyte Profile;  
143 Luminex xMAP) developed by Rules-Based Medicine (Austin, TX), that measures a variety of  
144 markers including cytokines, metabolic markers, and growth factors. We initially chose  
145 biomarkers available in plasma involved in inflammation and immune responses (cytokines,  
146 immunoglobulins, CRP, and ICAM1) and stress (cortisol; Table 2). We analysed the same  
147 biomarkers in CSF (however IgE and IL-18 are not available in CSF). The protocols used to  
148 quantify plasma and CSF analytes are described in Craig-Schapiro et al. [40] and Hu et al. [41].  
149 We used the ADNI quality-controlled data for plasma and CSF provided by the ADNI

150 Consortium. For plasma IL-16, we removed one outlier that was more than two times lower than  
151 the 25<sup>th</sup> percentile in the plasma data. Sensitivity analysis with the outlier present suggested that  
152 it was disproportionately influencing the results.

153 We compared all available data for each study variable between the sexes using the  
154 Wilcoxon rank sum test for continuous variables and Fisher's exact test for categorical variables.  
155 Nonparametric tests are standard for comparing variables where the distribution is unknown or  
156 expected to be non-normal. We used general linear models to determine the relationships  
157 between (1) sex and APOE genotype (non-carriers or carriers of APOE $\epsilon$ 4 alleles) or (2) sex and  
158 baseline diagnosis as predictor variables, and biomarkers as dependent variables. Due to the  
159 limited sample size, we were not able to study sex, APOE genotype, and baseline diagnosis in  
160 one model. All models included age and education as covariates. Initially, all models included an  
161 interaction between sex and presence of APOE $\epsilon$ 4 alleles or sex and baseline diagnosis; if this  
162 interaction was not significant, it was removed from the model to estimate the main effects of  
163 sex and APOE genotype or diagnosis. Significance was based on the likelihood ratio test, and all  
164 P-values for comparisons of sex and either APOE genotype or diagnosis for all outcomes  
165 combined were corrected for multiple testing using the Benjamini-Hochberg false discovery rate  
166 method with the family-wise error rate set to 0.05 [42]. In total, three P-values per dependent  
167 variable were included in each set of models (interaction term and main effects of sex and APOE  
168 or diagnosis) resulting in 27 P-values corrected in CSF (9 dependent variables) and 33 P-values  
169 corrected in plasma (11 dependent variables; Supplementary Tables S1 to S4) for each of the two  
170 models (sex and APOE and sex and diagnosis). Significant interaction terms were followed up  
171 using pairwise simple-effects tests with Benjamini-Hochberg P-value correction. A subset of  
172 participants with CSF measurements had corresponding plasma measurements (N= 237 total, N=

173 88 females and N=149 males). For each biomarker, we calculated Pearson's correlation  
174 coefficients between CSF and plasma levels in males and females separately. We then compared  
175 these correlations using the Fisher r-to-Z transformation and Z-test using the method by Zou  
176 [43]. We report significance differences (adjusted  $P \leq 0.05$ ) and trends (adjusted  $P \leq 0.08$ ). All  
177 regression analyses were carried out in R v3.5.1 [44].

178

## 179 **RESULTS**

### 180 *Demographic information*

181 Table 1 gives a summary of the variables for the participants with: CSF biomarkers  
182 (Table 1A; N=279), plasma biomarkers (Table 1B; N=527). Given the differences in sample  
183 sizes, we performed demographic analyses on the two datasets. Females were younger than  
184 males in the CSF ( $P < 0.01$ ) and plasma data set ( $P = 0.051$ ). In the two datasets, females had fewer  
185 years of education than males ( $P_s < 0.0001$ ). Thus, we used age and education level as covariates  
186 in the analyses. Although there were no sex differences in distribution of APOE $\epsilon$ 4 alleles in any  
187 of the two datasets (all  $P_s > 0.4$ ), the proportion of participants in each of the diagnosis categories  
188 was marginally different for females and males in the CSF dataset ( $P = 0.051$ ; Table 1 A) but not  
189 in the plasma dataset ( $P > 0.1$ ; Table 1 B).

190

### 191 *Sex and presence of APOE $\epsilon$ 4 alleles were associated with changes in inflammatory markers*

192 Our first aim was to investigate whether sex and APOE genotype interact to influence  
193 inflammation using biomarkers, which we analysed separately in CSF and plasma  
194 (Supplementary Table S1 and S3, respectively). Caution should be noted as inflammatory  
195 signalling can differ depending on tissue examined [45,46].



196 For inflammatory markers measured in CSF, only IL-16 and IL-8 elicited a significant  
197 interaction between sex and APOE genotype ( $P=0.016$  and  $P=0.035$ , respectively; Table 3). CSF  
198 IL-16 and IL-8 levels were significantly lower in females non-carriers of APOE $\epsilon$ 4 alleles  
199 compared to males (both  $P$ 's $<0.001$ ), whereas levels were similar between the sexes in carriers of  
200 APOE $\epsilon$ 4 alleles ( $P$ 's $>0.9$ ; Fig 1 A and B). Furthermore, in females with APOE $\epsilon$ 4 alleles, IL-16  
201 was significantly higher than in non-APOE $\epsilon$ 4 female carriers ( $P=0.050$ ), while a trend was  
202 observed in males ( $P=0.062$ ). Whereas for IL-8, males with APOE $\epsilon$ 4 alleles had lower levels of  
203 IL-8 compared to males with no APOE $\epsilon$ 4 alleles ( $P=0.014$ ) but there was no difference in  
204 females ( $P>0.3$ ). Regardless of sex, CSF CRP levels were lower in carriers of APOE $\epsilon$ 4 alleles  
205 compared to non-carriers (main effect of genotype:  $P=0.009$ ; Table 3; Fig 1 C). There was a  
206 trend for an increase in IL-6 receptor levels in APOE $\epsilon$ 4 carriers regardless of sex compared to  
207 non APOE $\epsilon$ 4 carriers (main effect of genotype:  $P=0.071$ ; Table 3). Lastly females had  
208 significantly lower CSF levels of IgA and ICAM1 and a trend for lower CSF cortisol levels  
209 compared to males (main effect of sex:  $P<0.001$ ;  $P=0.009$ , and  $P=0.070$ , respectively; Table 3).  
210 There were no other significant main or interaction effects on any other CSF biomarkers.

211 For biomarkers measured in plasma, there were no significant interactions between sex  
212 and APOE genotype (Supplementary Table S3). However, females had higher plasma CRP  
213 levels (main effect of sex:  $P=0.048$ ; Fig 1 D) and ICAM1 (trend for a main effect of sex:  
214  $P=0.051$ ) compared to males and significantly lower levels of IL-18 (main effect of sex:  
215  $P=0.001$ ; Fig 1 E) and immunoglobulin E (IgE: main effect of sex:  $P<0.001$ ; Fig 1 F) compared  
216 to males. Furthermore, plasma CRP decreased in carriers of APOE $\epsilon$ 4 alleles compared to non-  
217 carriers (main effect of genotype:  $P<0.001$ ; Fig 1 D).

218

219 *Sex and baseline diagnosis were associated with changes in inflammatory markers*

220 We next tested whether sex and baseline diagnosis status (CN, LMCI, and AD)  
221 influenced CSF and plasma biomarkers of inflammation (Supplementary Table S2 and S4,  
222 respectively). There were no significant interactions between sex and diagnosis for any of the  
223 tested variables in CSF (Table 4 and Supplementary Table S2) or plasma (Supplementary Table  
224 S4). For CSF levels, females had significantly lower levels of IgA (main effect of sex:  $P < 0.001$ )  
225 and ICAM1 (main effect of sex:  $P = 0.026$ ) and a trend for lower IL-16 levels (main effect of sex:  
226  $P = 0.055$ ) compared to males (Table 4; Fig 2 A-C), but we did not observe any significant main  
227 effects of diagnosis for any CSF variable.

228 In plasma, we found that females had lower levels of IgE (main effect of sex:  $P < 0.001$ )  
229 and IL-18 compared to males (main effect of sex:  $P = 0.004$ ) and trends for females to have higher  
230 levels of ICAM1 (main effect of sex:  $P = 0.056$ ) and CRP (main effect of sex:  $P = 0.056$ ; Fig. 2 D)  
231 compared to males. In addition, we found diagnosis significantly influenced plasma cortisol  
232 (main effect of baseline diagnosis:  $P = 0.01$ ) with lower levels in LMCI compared to AD  
233 ( $P < 0.001$ ; Fig 2 E). We found trends for diagnosis to influence plasma IL-16, CRP, and CD 40  
234 levels (main effect of diagnosis:  $P = 0.054$ ,  $P = 0.056$ ;  $P = 0.067$ ). Plasma IL-16 ( $P = 0.006$ ) and  
235 CRP ( $P = 0.006$  and  $P = 0.02$ ) levels were lower in LMCI and AD compared to CN (Fig 2 D and  
236 F). For plasma CD 40, levels were lower in LMCI compared to AD ( $P = 0.01$ ; Supplementary  
237 Table S4). In summary, although we detected associations between sex and diagnosis and  
238 various biomarkers, we did not find evidence of a sex and diagnosis interaction on any variables  
239 examined.

240

241 *Correlations between cerebrospinal and plasma levels of biomarkers were mostly positive*

242           The results for inflammatory markers in plasma did not always match results in CSF  
243 (Supplementary Tables S2 and S4). We therefore investigated the relationship between plasma  
244 and CSF biomarkers in males and females (Table 5, Fig 3). Perhaps surprisingly, we found the  
245 majority of biomarkers were significantly positively correlated between plasma and CSF levels  
246 in both males and females. These significant positive correlations included CRP (males,  $r=0.793$ ;  
247 females  $r=0.860$ ;  $P's<0.0001$ ), IL-6 receptor (males,  $r=0.459$ ; females  $r=0.493$ ,  $P's<0.0001$ ), IgA  
248 (males,  $r=0.705$ ; females  $r=0.529$ ;  $P's<0.0001$ ), and cortisol in both sexes (males,  $r=0.176$ ;  
249 females,  $r=0.327$ ;  $P=0.032$  and  $0.002$ , respectively). IL-16 was significantly correlated in females  
250 ( $r=0.290$ ,  $P=0.006$ ) but only a trend in males ( $r=0.156$ ,  $P=0.058$ ). Plasma and CSF levels of  
251 ICAM1 and CD 40 were positively correlated in males only ( $r=0.231$ ,  $P=0.005$  and  $r=0.374$ ,  
252  $P<0.0001$ , respectively) whereas plasma and CSF IL-3 levels were negatively correlated in  
253 females only ( $r=-0.246$ ,  $P=0.021$ ; Fig 3). There were significant sex differences, favoring males,  
254 in the strength of correlation between the sexes for CD 40 ( $P=0.01$ ) and IgA ( $P=0.03$ ), with  
255 trends for sex differences, favouring males in ICAM1 ( $P=0.06$ ) and favouring females in IL-3  
256 ( $P=0.06$ ).

257

## 258 **DISCUSSION**

259           In the present study using ADNI data from CN, LMCI, and AD participants we found  
260 interactions between sex and APOE genotype (but not between sex and diagnosis) on CSF and  
261 plasma levels of IL-8 and IL-16 (see Table 2 for summary of the results). CSF levels of IL-8 and  
262 IL-16 were on average lower in female APOE $\epsilon$ 4 non-carriers compared to males but similar  
263 levels were found between the sexes in APOE $\epsilon$ 4 allele carriers. Regardless of sex, the APOE $\epsilon$ 4  
264 allele was associated with decreased levels of CSF and plasma CRP. Sex differences were seen

265 in inflammatory markers, regardless of diagnosis or genotype, as females had lower CSF  
266 cytokines (IL-16, IL-18), CSF ICAM1, CSF and plasma immunoglobulins (IgA, IgE), and  
267 plasma IL-18. However, tissue (CSF, plasma) mattered for results for certain inflammatory  
268 markers (ICAM1 and to a lesser extent CRP) as females had higher plasma CRP and ICAM1  
269 compared to males, opposite to what was found in CSF. Despite these differences in outcomes  
270 between plasma and CSF biomarker analyses, plasma and CSF levels were positively correlated  
271 for cortisol, CRP, IL-6 receptor, IgA in both sexes, whereas IL-16, and IL-8 were correlated in  
272 females and CD 40 and ICAM1 were correlated in males, indicating good consistency between  
273 CSF and plasma levels of these biomarkers. Intriguingly, IL-3 stood out from all these  
274 biomarkers with a negative correlation between CSF and plasma levels in females only. Males  
275 exhibited significantly stronger correlations between plasma and CSF levels for CD 40 and IgA  
276 compared to females. Sex and APOE genotype differences in CSF and plasma inflammatory  
277 markers suggest differences in underlying physiology that may affect aging and the progression  
278 of AD and this should be considered in future studies. Researchers should be cautioned to use  
279 sex as a biological variable in all analyses.

280

281 *Sex interacted with presence of APOE $\epsilon$ 4 alleles to affect levels of IL-8 and IL-16*

282 In this study, we found that sex interacted with APOE genotype to influence CSF IL-16  
283 and IL-8. CSF IL-16 and IL-8 levels were lower in females with no APOE $\epsilon$ 4 alleles compared to  
284 males, but no sex differences in these cytokine levels were detected in participants carrying  
285 APOE $\epsilon$ 4 alleles. Our results suggest that presence of APOE $\epsilon$ 4 alleles can modulate CSF (and  
286 potentially plasma) cytokine levels in a sex-dependent way. The APOE protein can regulate  
287 transcription in vitro [47] and APOE4, but not APOE3, increases levels of IL-6 and IL-8 in vitro

288 [48]. In the current study, we found that the sex differences in IL-16 and IL-8 levels disappeared  
289 in carriers of APOE $\epsilon$ 4 alleles. One possibility is that the APOE4 protein regulates cytokine levels  
290 differently in males and females. IL-16 has been implicated in AD [49] and plasma IL-16 levels  
291 decreased with diagnosis (in males and females; current study) and AD severity (analysis  
292 without regard to sex; [50]). On the other hand, levels of IL-8 were not affected by diagnosis,  
293 consistent with a meta-analysis of cytokines in AD [22]. It is unclear what the impact of  
294 regulation of CSF cytokine levels by sex and APOE $\epsilon$ 4 has on AD symptoms or pathology,  
295 however given that females with APOE $\epsilon$ 4 alleles are disproportionately affected by AD during  
296 certain ages [16,18], IL-16 and IL-8 levels are unlikely to be a mechanism for this effect as  
297 differences in sex by genotype were noticed in the absence not presence of APOE $\epsilon$ 4 alleles.

298

299 *Females had higher CRP levels compared to males and CRP levels were lower in APOE $\epsilon$ 4*  
300 *carriers*

301 We found that plasma and CSF levels of CRP, a widely used inflammatory and  
302 cardiovascular marker [51,52], were independently affected by sex and APOE genotype.  
303 Females, regardless of diagnosis or APOE $\epsilon$ 4 alleles, had significantly higher plasma CRP  
304 relative to males, consistent with findings in healthy individuals [53]. Higher levels of peripheral  
305 CRP may suggest higher systemic inflammation in females, which is associated with an  
306 increased risk in all-cause dementia [54]. Higher levels of serum CRP are also associated with  
307 higher levels of serum estradiol in postmenopausal healthy females [55] which suggests that sex  
308 differences in CRP levels may be partly due to sex differences in estradiol levels or other sex  
309 hormones. A recent study using the ADNI database, found that low testosterone levels was  
310 associated with higher tau pathology especially among APOE $\epsilon$ 4 carriers, regardless of sex,

311 suggesting that testosterone maybe neuroprotective in both sexes [56]. In addition, we found that  
312 the presence of APOE $\epsilon$ 4 alleles decreased plasma and CSF CRP levels consistent with previous  
313 research in large population studies [57,58]. In our study, we also found a trend for lower levels  
314 of plasma CRP with LMCI and AD compared to CN. Recent meta-analyses did not find  
315 differences in peripheral levels of CRP in AD compared to healthy controls [59,60]. However, in  
316 participants with mild and moderate dementia only, serum CRP levels were lower compared to  
317 the cognitively healthy group [59]. In healthy individuals, higher levels of plasma CRP in midlife  
318 are associated with a higher amyloid burden later in life in males but not females [27]. However,  
319 despite this finding, higher systemic inflammation in midlife (including CRP) is associated with  
320 greater cognitive decline later in life in both sexes in healthy individuals [28]. It is important to  
321 acknowledge evidence that midlife obesity, but not later life obesity, is associated with an  
322 increased risk to develop dementia [61,62], which may be related to altered inflammation (e.g.,  
323 cytokines and CRP) due to the accumulation of adipose tissue [63,64]. It is possible that sex  
324 differences in inflammation and/or obesity earlier in life have long-term effects on the transition  
325 to MCI and/or AD.

326

327 *Females had lower cytokine and immunoglobulin levels compared to males*

328 We found some biomarkers that were affected by sex, but not diagnosis or presence of  
329 APOE $\epsilon$ 4 alleles. For example, females had lower CSF levels of ICAM1 compared to males,  
330 regardless of APOE genotype or diagnosis, but, although a trend, the opposite effect was seen in  
331 plasma. In contrast, in healthy adults (18-55 years old), serum levels of ICAM1 are lower in  
332 females compared to males [65]. ICAM1 is a type of adhesion molecule associated with  
333 microvascular endothelial activation [66] and plasma ICAM1 levels (but not CSF levels; [67])

334 were higher in patients with AD [67–69]. Although in the present study we did not observe a  
335 significant effect of plasma ICAM1 with diagnosis, the unadjusted P-value was 0.063 with  
336 higher levels in LMCI and AD groups. It is intriguing that females have lower CSF levels of  
337 cytokines (IL-16, IL-18), ICAM1, and immunoglobulins (IgE and IgA) but higher plasma CRP  
338 and ICAM1 levels. Although neuroinflammation is associated with AD, it may be both a product  
339 and a driver of neurodegeneration, and it may have both beneficial and detrimental roles in AD  
340 [70,71]. In AD mouse models, inflammatory cytokines (e.g., IL1 $\beta$ , IL-4, IL-6, IL-10, IFN $\gamma$ ,  
341 TNF $\alpha$ ) can both increase amyloid beta deposition and reduce amyloid plaque pathology [72–80].  
342 In transgenic mice, amyloid deposition is associated with low T-cell activation suggesting that  
343 the immune system is hypo-responsive to amyloid beta [81]. Thus, increases of inflammatory  
344 markers may not always be indicative of worse neuropathology or outcomes, but may be  
345 contributing to reductions in AD neuropathology. It is also possible that males and females have  
346 varying levels of beneficial vs detrimental immune responses which can differentially affect how  
347 the disease progresses between the sexes. Indeed, we found sex differences in the correlation  
348 between CSF and plasma biomarkers (CD 40, IgA, ICAM1, and IL-3), which suggests that  
349 plasma and CSF levels may be regulated differently in males and females.

350

### 351 *Limitations*

352 In this exploratory study, we used two separate ADNI datasets (CSF biomarkers and  
353 plasma biomarkers) with a large overlap of individuals (85%) but different sample sizes that  
354 resulted in differences in the demographics between the datasets and power across the datasets  
355 for the analyses conducted. Because of this, the proportion of APOE or diagnosis by sex could  
356 differ across these datasets. While the proportion of sex by APOEe4 carriers did not differ

357 substantially between the datasets, the proportion of participants in each of the diagnosis groups  
358 was not similar across datasets causing differences in statistical power to detect the interaction  
359 term of diagnosis and sex. In addition, in this cohort the proportion of participants in the different  
360 APOE $\epsilon$ 4 allele groups was correlated with diagnosis (Supplemental Table S5). Thus, a larger  
361 cohort is required to test how sex, APOE genotype, and diagnosis interact together in one model.

362 More generally, the ADNI cohort is not ethnically or socioeconomically diverse, being  
363 mostly composed of self-reported white (only 12 individuals were not-white) and highly  
364 educated individuals (average 15.69 years of education). As AD incidence, prevalence, and age  
365 of onset varies by ethnicity [82–84] and education [85], our conclusions may not apply to more  
366 ethnically and socially diverse populations. In addition to sex, it is possible the underlying  
367 mechanisms of AD are different depending on ethnicity. Additionally, other pathologies in these  
368 participants, such as cancer, cardiovascular disease, smoking status, or obesity may have  
369 influenced inflammatory markers and limited our interpretations.

370

## 371 **CONCLUSION**

372 The current study provides evidence that sex and presence of APOE $\epsilon$ 4 alleles are  
373 associated with CSF levels of the inflammatory markers IL-16 and IL-8. We found sex  
374 differences indicating that females had lower cytokine and immunoglobulin levels but higher  
375 plasma CRP and ICAM1 levels compared to males, although the direction of the ICAM1 finding  
376 was tissue-dependent. Together, our work suggests that that presence of APOE $\epsilon$ 4 alleles can  
377 affect cytokine levels differently in males and females and the underlying pathophysiology of  
378 aging and AD may be tissue- and sex-specific.

379



380 **ACKNOWLEDGMENTS**

381 Data collection and sharing for this project was funded by the Alzheimer's Disease  
382 Neuroimaging Initiative (ADNI) (National Institutes of Health Grant U01 AG024904) and DOD  
383 ADNI (Department of Defense award number W81XWH-12-2-0012). ADNI is funded by the  
384 National Institute on Aging, the National Institute of Biomedical Imaging and Bioengineering,  
385 and through generous contributions from the following: AbbVie, Alzheimer's Association;  
386 Alzheimer's Drug Discovery Foundation; Araclon Biotech; BioClinica, Inc.; Biogen; Bristol-  
387 Myers Squibb Company; CereSpir, Inc.; Cogstate; Eisai Inc.; Elan Pharmaceuticals, Inc.; Eli  
388 Lilly and Company; EuroImmun; F. Hoffmann-La Roche Ltd and its affiliated company  
389 Genentech, Inc.; Fujirebio; GE Healthcare; IXICO Ltd.; Janssen Alzheimer Immunotherapy  
390 Research & Development, LLC.; Johnson & Johnson Pharmaceutical Research & Development  
391 LLC.; Lumosity; Lundbeck; Merck & Co., Inc.; Meso Scale Diagnostics, LLC.; NeuroRx  
392 Research; Neurotrack Technologies; Novartis Pharmaceuticals Corporation; Pfizer Inc.; Piramal  
393 Imaging; Servier; Takeda Pharmaceutical Company; and Transition Therapeutics. The Canadian  
394 Institutes of Health Research is providing funds to support ADNI clinical sites in Canada. Private  
395 sector contributions are facilitated by the Foundation for the National Institutes of Health  
396 ([www.fnih.org](http://www.fnih.org)). The grantee organization is the Northern California Institute for Research and  
397 Education, and the study is coordinated by the Alzheimer's Therapeutic Research Institute at the  
398 University of Southern California. ADNI data are disseminated by the Laboratory for Neuro  
399 Imaging at the University of Southern California. Funding for this study was provided by a  
400 Canadian Institutes of Health Research (CHIR) grant to LAMG (PJT-148662). PDG is funded by  
401 the Alzheimer's Association of the USA and Brain Canada with the financial support of Health  
402 Canada through the Brain Canada Research Fund (AARF-17-529705). The views expressed

403 herein do not necessarily represent the views of the Minister of Health or the Government of  
404 Canada. AMI is funded by a University of British Columbia Four Year Doctoral Fellowship and  
405 the CIHR Frederick Banting and Charles Best Masters Research Award. We thank Elizabeth  
406 Perez for help with data organization.

407

#### 408 **CONFLICT OF INTEREST**

409 The authors have no conflict of interest to report.

410

#### 411 **REFERENCES**

- 412 [1] Alzheimer's Association (2017) 2017 Alzheimer's disease facts and figures. *Alzheimer's &*  
413 *Dementia* **13**, 325–373.
- 414 [2] Caruso A, Nicoletti F, Mango D, Saidi A, Orlando R, Scaccianoce S (2018) Stress as risk factor  
415 for Alzheimer's disease. *Pharmacological Research* **132**, 130–134.
- 416 [3] Baumgart M, Snyder HM, Carrillo MC, Fazio S, Kim H, Johns H (2015) Summary of the  
417 evidence on modifiable risk factors for cognitive decline and dementia: A population-based  
418 perspective. *Alzheimers Dement* **11**, 718–726.
- 419 [4] Nebel RA, Aggarwal NT, Barnes LL, Gallagher A, Goldstein JM, Kantarci K, Mallampalli MP,  
420 Mormino EC, Scott L, Yu WH, Maki PM, Mielke MM (2018) Understanding the impact of sex  
421 and gender in Alzheimer's disease: A call to action. *Alzheimer's & Dementia* **14**, 1171–1183.
- 422 [5] Xu W, Tan L, Wang H-F, Jiang T, Tan M-S, Tan L, Zhao Q-F, Li J-Q, Wang J, Yu J-T (2015)  
423 Meta-analysis of modifiable risk factors for Alzheimer's disease. *J Neurol Neurosurg Psychiatry*  
424 **86**, 1299–1306.
- 425 [6] Riedel BC, Thompson PM, Brinton RD (2016) Age, APOE and sex: Triad of risk of Alzheimer's  
426 disease. *The Journal of Steroid Biochemistry and Molecular Biology* **160**, 134–147.
- 427 [7] Laws KR, Irvine K, Gale TM (2018) Sex differences in Alzheimer's disease. *Current Opinion in*  
428 *Psychiatry* **31**, 133–139.
- 429 [8] Mielke MM (2018) Sex and Gender Differences in Alzheimer's Disease Dementia. *Psychiatr*  
430 *Times* **35**, 14–17.
- 431 [9] Irvine K, Laws KR, Gale TM, Kondel TK (2012) Greater cognitive deterioration in women than  
432 men with Alzheimer's disease: a meta analysis. *J Clin Exp Neuropsychol* **34**, 989–998.
- 433 [10] Lin KA, Choudhury KR, Rathakrishnan BG, Marks DM, Petrella JR, Doraiswamy PM (2015)  
434 Marked gender differences in progression of mild cognitive impairment over 8 years. *Alzheimer's*  
435 *& Dementia: Translational Research & Clinical Interventions* **1**, 103–110.
- 436 [11] Wang X, Zhou W, Ye T, Lin X, Zhang J, Initiative for ADN (2019) Sex Difference in the  
437 Association of APOE4 with Memory Decline in Mild Cognitive Impairment. *Journal of*  
438 *Alzheimer's Disease* **69**, 1161–1169.
- 439 [12] Ardekani BA, Convit A, Bachman AH (2016) Analysis of the MIRIAD Data Shows Sex  
440 Differences in Hippocampal Atrophy Progression. *J. Alzheimers Dis.* **50**, 847–857.

- 441 [13] Barnes LL, Wilson RS, Bienias JL, Schneider JA, Evans DA, Bennett DA (2005) Sex differences  
442 in the clinical manifestations of Alzheimer disease pathology. *Arch. Gen. Psychiatry* **62**, 685–  
443 691.
- 444 [14] Holland D, Desikan RS, Dale AM, McEvoy LK, Alzheimer’s Disease Neuroimaging Initiative  
445 (2013) Higher rates of decline for women and apolipoprotein E epsilon4 carriers. *AJNR Am J*  
446 *Neuroradiol* **34**, 2287–2293.
- 447 [15] Hua X, Hibar DP, Lee S, Toga AW, Jack CR, Weiner MW, Thompson PM (2010) Sex and age  
448 differences in atrophic rates: an ADNI study with n=1368 MRI scans. *Neurobiology of Aging* **31**,  
449 1463–1480.
- 450 [16] Neu SC, Pa J, Kukull W, Beekly D, Kuzma A, Gangadharan P, Wang L-S, Romero K, Arneric  
451 SP, Redolfi A, Orlandi D, Frisoni GB, Au R, Devine S, Auerbach S, Espinosa A, Boada M, Ruiz  
452 A, Johnson SC, Kosciak R, Wang J-J, Hsu W-C, Chen Y-L, Toga AW (2017) Apolipoprotein E  
453 Genotype and Sex Risk Factors for Alzheimer Disease: A Meta-analysis. *JAMA Neurol.*
- 454 [17] Beydoun MA, Boueiz A, Abougergi MS, Kitzner-Triolo MH, Beydoun HA, Resnick SM, O’Brien  
455 R, Zonderman AB (2012) Sex differences in the association of the apolipoprotein E epsilon 4  
456 allele with incidence of dementia, cognitive impairment, and decline. *Neurobiol. Aging* **33**, 720-  
457 731.e4.
- 458 [18] Hohman TJ, Dumitrescu L, Barnes LL, Thambisetty M, Beecham G, Kunkle B, Gifford KA,  
459 Bush WS, Chibnik LB, Mukherjee S, Jager PLD, Kukull W, Crane PK, Resnick SM, Keene CD,  
460 Montine TJ, Schellenberg GD, Haines JL, Zetterberg H, Blennow K, Larson EB, Johnson SC,  
461 Albert M, Bennett DA, Schneider JA, Jefferson AL (2018) Sex-Specific Association of  
462 Apolipoprotein E With Cerebrospinal Fluid Levels of Tau. *JAMA Neurol* **75**, 989–998.
- 463 [19] Koran MEI, Wagener M, Hohman TJ, Alzheimer’s Neuroimaging Initiative (2017) Sex  
464 differences in the association between AD biomarkers and cognitive decline. *Brain Imaging*  
465 *Behav* **11**, 205–213.
- 466 [20] Heppner FL, Ransohoff RM, Becher B (2015) Immune attack: the role of inflammation in  
467 Alzheimer disease. *Nature Reviews Neuroscience* **16**, 358–372.
- 468 [21] Kinney JW, Bemiller SM, Murtishaw AS, Leisgang AM, Salazar AM, Lamb BT (2018)  
469 Inflammation as a central mechanism in Alzheimer’s disease. *Alzheimer’s & Dementia:*  
470 *Translational Research & Clinical Interventions* **4**, 575–590.
- 471 [22] Swardfager W, Lanctôt K, Rothenburg L, Wong A, Cappell J, Herrmann N (2010) A Meta-  
472 Analysis of Cytokines in Alzheimer’s Disease. *Biological Psychiatry* **68**, 930–941.
- 473 [23] Engler H, Benson S, Wegner A, Spreitzer I, Schedlowski M, Elsenbruch S (2016) Men and  
474 women differ in inflammatory and neuroendocrine responses to endotoxin but not in the severity  
475 of sickness symptoms. *Brain, Behavior, and Immunity* **52**, 18–26.
- 476 [24] Klein SL, Flanagan KL (2016) Sex differences in immune responses. *Nature Reviews*  
477 *Immunology* **16**, 626–638.
- 478 [25] Wegner A, Benson S, Rebernik L, Spreitzer I, Jäger M, Schedlowski M, Elsenbruch S, Engler H  
479 (2017) Sex differences in the pro-inflammatory cytokine response to endotoxin unfold in vivo but  
480 not ex vivo in healthy humans. *Innate Immun* **23**, 432–439.
- 481 [26] Márquez EJ, Chung C, Marches R, Rossi RJ, Nehar-Belaid D, Eroglu A, Mellert DJ, Kuchel GA,  
482 Banchereau J, Ucar D (2020) Sexual-dimorphism in human immune system aging. *Nature*  
483 *Communications* **11**, 751.
- 484 [27] Walker KA, Windham BG, Brown IV CH, Knopman DS, Jack Jr CR, Mosley Jr TH, Selvin E,  
485 Wong DF, Hughes TM, Zhou Y, Gross AL, Gottesman RF (2018) The Association of Mid- and  
486 Late-Life Systemic Inflammation with Brain Amyloid Deposition: The ARIC-PET Study.  
487 *Journal of Alzheimer’s Disease* **66**, 1041–1052.
- 488 [28] Walker KA, Gottesman RF, Wu A, Knopman DS, Gross AL, Mosley TH, Selvin E, Windham  
489 BG (2019) Systemic inflammation during midlife and cognitive change over 20 years. *Neurology*  
490 **92**, e1256–e1267.

- 491 [29] Dantzer R (2018) Neuroimmune Interactions: From the Brain to the Immune System and Vice  
492 Versa. *Physiol. Rev.* **98**, 477–504.
- 493 [30] de Miranda AS, Zhang C-J, Katsumoto A, Teixeira AL (2017) Hippocampal adult neurogenesis:  
494 Does the immune system matter? *Journal of the Neurological Sciences* **372**, 482–495.
- 495 [31] Apostolova LG, Dutton RA, Dinov ID, Hayashi KM, Toga AW, Cummings JL, Thompson PM  
496 (2006) Conversion of mild cognitive impairment to Alzheimer disease predicted by hippocampal  
497 atrophy maps. *Arch. Neurol.* **63**, 693–699.
- 498 [32] Petersen RC, Jack CR, Xu YC, Waring SC, O’Brien PC, Smith GE, Ivnik RJ, Tangalos EG,  
499 Boeve BF, Kokmen E (2000) Memory and MRI-based hippocampal volumes in aging and AD.  
500 *Neurology* **54**, 581–587.
- 501 [33] Doecke JD, Laws SM, Faux NG, Wilson W, Burnham SC, Lam C-P, Mondal A, Bedo J, Bush  
502 AI, Brown B, Ruyck KD, Ellis KA, Fowler C, Gupta VB, Head R, Macaulay SL, Pertile K, Rowe  
503 CC, Rembach A, Rodrigues M, Rumble R, Szoeki C, Taddei K, Taddei T, Trounson B, Ames D,  
504 Masters CL, Martins RN, Group for the ADNI and AIB and LR (2012) Blood-Based Protein  
505 Biomarkers for Diagnosis of Alzheimer Disease. *Arch Neurol* **69**, 1318–1325.
- 506 [34] Toledo JB, Toledo E, Weiner MW, Jack CR, Jagust W, Lee VM-Y, Shaw LM, Trojanowski JQ  
507 (2012) Cardiovascular risk factors, cortisol, and amyloid- $\beta$  deposition in Alzheimer’s Disease  
508 Neuroimaging Initiative. *Alzheimers Dement* **8**, 483–489.
- 509 [35] Lupien SJ, de Leon M, de Santi S, Convit A, Tarshish C, Nair NP, Thakur M, McEwen BS,  
510 Hauger RL, Meaney MJ (1998) Cortisol levels during human aging predict hippocampal atrophy  
511 and memory deficits. *Nat. Neurosci.* **1**, 69–73.
- 512 [36] Murphy KJ, Sheppard PAS, Troyer AK, Hampson E, Galea LAM (2019) Sex differences in  
513 cortisol and memory following acute social stress in amnesic mild cognitive impairment. *bioRxiv*  
514 757484.
- 515 [37] McEwen BS, Biron CA, Brunson KW, Bulloch K, Chambers WH, Dhabhar FS, Goldfarb RH,  
516 Kitson RP, Miller AH, Spencer RL, Weiss JM (1997) The role of adrenocorticoids as modulators  
517 of immune function in health and disease: neural, endocrine and immune interactions. *Brain*  
518 *Research Reviews* **23**, 79–133.
- 519 [38] Aisen P, Petersen R, Donohue M, Gamst A, Raman R, Thomas R, Walter S, Trojanowski J, Shaw  
520 L, Beckett L, Jack C, Jagust W, Toga A, Saykin A, Morris J, Weiner M (2010) Clinical core of  
521 the Alzheimer’s Disease Neuroimaging Initiative: progress and plans. *Alzheimers Dement* **6**,  
522 239–246.
- 523 [39] Petersen RC, Aisen PS, Beckett LA, Donohue MC, Gamst AC, Harvey DJ, Jack CR, Jagust WJ,  
524 Shaw LM, Toga AW, Trojanowski JQ, Weiner MW (2010) Alzheimer’s Disease Neuroimaging  
525 Initiative (ADNI). *Neurology* **74**, 201–209.
- 526 [40] Craig-Schapiro R, Kuhn M, Xiong C, Pickering EH, Liu J, Misko TP, Perrin RJ, Bales KR,  
527 Soares H, Fagan AM, Holtzman DM (2011) Multiplexed Immunoassay Panel Identifies Novel  
528 CSF Biomarkers for Alzheimer’s Disease Diagnosis and Prognosis. *PLOS ONE* **6**, e18850.
- 529 [41] Hu WT, Holtzman DM, Fagan AM, Shaw LM, Perrin R, Arnold SE, Grossman M, Xiong C,  
530 Craig-Schapiro R, Clark CM, Pickering E, Kuhn M, Chen Y, Van Deerlin VM, McCluskey L,  
531 Elman L, Karlawish J, Chen-Plotkin A, Hurtig HI, Siderowf A, Swenson F, Lee VM-Y, Morris  
532 JC, Trojanowski JQ, Soares H, Alzheimer’s Disease Neuroimaging Initiative (2012) Plasma  
533 multianalyte profiling in mild cognitive impairment and Alzheimer disease. *Neurology* **79**, 897–  
534 905.
- 535 [42] Benjamini Y, Hochberg Y (1995) Controlling the False Discovery Rate: A Practical and  
536 Powerful Approach to Multiple Testing. *Journal of the Royal Statistical Society. Series B*  
537 *(Methodological)* **57**, 289–300.
- 538 [43] Zou GY (2007) Toward using confidence intervals to compare correlations. *Psychological*  
539 *Methods* **12**, 399–413.

- 540 [44] R Core Team (2018) *R: A language and environment for statistical computing*. R Foundation  
541 for Statistical Computing, Vienna, Austria., R Foundation for Statistical Computing, Vienna,  
542 Austria.
- 543 [45] Bettcher BM, Johnson SC, Fitch R, Casaletto KB, Heffernan KS, Asthana S, Zetterberg H,  
544 Blennow K, Carlsson CM, Neuhaus J, Bendlin BB, Kramer JH (2018) CSF and Plasma Levels of  
545 Inflammation Differentially Relate to CNS Markers of Alzheimer’s Disease Pathology and  
546 Neuronal Damage. *J Alzheimers Dis* **62**, 385–397.
- 547 [46] Setiawan E, Wilson AA, Mizrahi R, Rusjan PM, Miler L, Rajkowska G, Suridjan I, Kennedy JL,  
548 Rekkas PV, Houle S, Meyer JH (2015) Role of translocator protein density, a marker of  
549 neuroinflammation, in the brain during major depressive episodes. *JAMA Psychiatry* **72**, 268–  
550 275.
- 551 [47] Theendakara V, Peters-Libeu CA, Bredesen DE, Rao RV (2018) Transcriptional Effects of  
552 ApoE4: Relevance to Alzheimer’s Disease. *Molecular Neurobiology* **55**, 5243–5254.
- 553 [48] Theendakara V, Peters-Libeu CA, Spilman P, Poksay KS, Bredesen DE, Rao RV (2016) Direct  
554 Transcriptional Effects of Apolipoprotein E. *The Journal of Neuroscience* **36**, 685–700.
- 555 [49] Rosa MD, Dell’Ombra N, Zambito AM, Malaguarnera M, Nicoletti F, Malaguarnera L (2006)  
556 Chitotriosidase and inflammatory mediator levels in Alzheimer’s disease and cerebrovascular  
557 dementia. *European Journal of Neuroscience* **23**, 2648–2656.
- 558 [50] Motta M, Imbesi R, Di Rosa M, Stivala F, Malaguarnera L (2007) Altered plasma cytokine levels  
559 in Alzheimer’s disease: Correlation with the disease progression. *Immunology Letters* **114**, 46–  
560 51.
- 561 [51] Koenig W, Sund M, Fröhlich M, Fischer HG, Löwel H, Döring A, Hutchinson WL, Pepys MB  
562 (1999) C-Reactive protein, a sensitive marker of inflammation, predicts future risk of coronary  
563 heart disease in initially healthy middle-aged men: results from the MONICA (Monitoring  
564 Trends and Determinants in Cardiovascular Disease) Augsburg Cohort Study, 1984 to 1992.  
565 *Circulation* **99**, 237–242.
- 566 [52] Ridker PM, Buring JE, Shih J, Matias M, Hennekens CH (1998) Prospective study of C-reactive  
567 protein and the risk of future cardiovascular events among apparently healthy women.  
568 *Circulation* **98**, 731–733.
- 569 [53] Khera A, McGuire DK, Murphy SA, Stanek HG, Das SR, Vongpatanasin W, Wians FH, Grundy  
570 SM, de Lemos JA (2005) Race and gender differences in C-reactive protein levels. *J. Am. Coll.*  
571 *Cardiol.* **46**, 464–469.
- 572 [54] Koyama A, O’Brien J, Weuve J, Blacker D, Metti AL, Yaffe K (2013) The role of peripheral  
573 inflammatory markers in dementia and Alzheimer’s disease: a meta-analysis. *J. Gerontol. A Biol.*  
574 *Sci. Med. Sci.* **68**, 433–440.
- 575 [55] Eldridge RC, Wentzensen N, Pfeiffer RM, Brinton LA, Hartge P, Guillemette C, Kemp TJ, Pinto  
576 LA, Trabert B (2020) Endogenous estradiol and inflammation biomarkers: potential interacting  
577 mechanisms of obesity-related disease. *Cancer Causes Control*.
- 578 [56] Sundermann EE, Panizzon MS, Chen X, Andrews M, Galasko D, Banks SJ, for the Alzheimer’s  
579 Disease Neuroimaging Initiative (2020) Sex differences in Alzheimer’s-related Tau biomarkers  
580 and a mediating effect of testosterone. *Biology of Sex Differences* **11**, 33.
- 581 [57] Hubacek JA, Peasey A, Pikhart H, Stavek P, Kubinova R, Marmot M, Bobak M (2010) APOE  
582 polymorphism and its effect on plasma C-reactive protein levels in a large general population  
583 sample. *Hum Immunol* **71**, 304–308.
- 584 [58] Yun Y-W, Kweon S-S, Choi J-S, Rhee J-A, Lee Y-H, Nam H-S, Jeong S-K, Park K-S, Ryu S-Y,  
585 Choi S-W, Kim HN, Cauley JA, Shin M-H (2015) APOE Polymorphism Is Associated with C-  
586 reactive Protein Levels but Not with White Blood Cell Count: Dong-gu Study and Namwon  
587 Study. *J Korean Med Sci* **30**, 860–865.
- 588 [59] Gong C, Wei D, Wang Y, Ma J, Yuan C, Zhang W, Yu G, Zhao Y (2016) A Meta-Analysis of C-  
589 Reactive Protein in Patients With Alzheimer’s Disease. *Am J Alzheimers Dis Other Demen* **31**,  
590 194–200.

- 591 [60] Ng A, Tam WW, Zhang MW, Ho CS, Husain SF, McIntyre RS, Ho RC (2018) IL-1 $\beta$ , IL-6, TNF-  
592  $\alpha$  and CRP in Elderly Patients with Depression or Alzheimer's disease: Systematic Review and  
593 Meta-Analysis. *Scientific Reports* **8**, 12050.
- 594 [61] Albanese E, Launer LJ, Egger M, Prince MJ, Giannakopoulos P, Wolters FJ, Egan K (2017)  
595 Body mass index in midlife and dementia: Systematic review and meta-regression analysis of  
596 589,649 men and women followed in longitudinal studies. *Alzheimers Dement (Amst)* **8**, 165–  
597 178.
- 598 [62] Fitzpatrick AL, Kuller LH, Lopez OL, Diehr P, O'Meara ES, Longstreth WT, Luchsinger JA  
599 (2009) Midlife and Late-Life Obesity and the Risk of Dementia: Cardiovascular Health Study.  
600 *Arch Neurol* **66**, 336–342.
- 601 [63] Nguyen JCD, Killcross AS, Jenkins TA (2014) Obesity and cognitive decline: role of  
602 inflammation and vascular changes. *Front. Neurosci.* **8**,.
- 603 [64] Parimisetty A, Dorsemans A-C, Awada R, Ravanan P, Diotel N, Lefebvre d'Hellencourt C  
604 (2016) Secret talk between adipose tissue and central nervous system via secreted factors—an  
605 emerging frontier in the neurodegenerative research. *Journal of Neuroinflammation* **13**, 67.
- 606 [65] Ponthieux A, Herbeth B, Drosch S, Lambert D, Visvikis S (2003) Age- and Sex-related  
607 Reference Values for Serum Adhesion Molecule Concentrations in Healthy Individuals:  
608 Intercellular Adhesion Molecule-1 and E-, P-, and L-Selectin. *Clinical Chemistry* **49**, 1544–1546.
- 609 [66] Zenaro E, Piacentino G, Constantin G (2017) The blood-brain barrier in Alzheimer's disease.  
610 *Neurobiology of Disease* **107**, 41–56.
- 611 [67] Nielsen HM, Londos E, Minthon L, Janciauskiene SM (2007) Soluble adhesion molecules and  
612 angiotensin-converting enzyme in dementia. *Neurobiol. Dis.* **26**, 27–35.
- 613 [68] Huang C-W, Tsai M-H, Chen N-C, Chen W-H, Lu Y-T, Lui C-C, Chang Y-T, Chang W-N,  
614 Chang AYW, Chang C-C (2015) Clinical significance of circulating vascular cell adhesion  
615 molecule-1 to white matter disintegrity in Alzheimer's dementia. *Thrombosis and Haemostasis*  
616 **114**, 1230–1240.
- 617 [69] Rentzos M, Michalopoulou M, Nikolaou C, Cambouri C, Rombos A, Dimitrakopoulos A, Kapaki  
618 E, Vassilopoulos D (2004) Serum Levels of Soluble Intercellular Adhesion Molecule-1 and  
619 Soluble Endothelial Leukocyte Adhesion Molecule-1 in Alzheimer's Disease. *J Geriatr*  
620 *Psychiatry Neurol* **17**, 225–231.
- 621 [70] Heneka MT, Carson MJ, Khoury JE, Landreth GE, Brosseron F, Feinstein DL, Jacobs AH,  
622 Wyss-Coray T, Vitorica J, Ransohoff RM, Herrup K, Frautschy SA, Finsen B, Brown GC,  
623 Verkhratsky A, Yamanaka K, Koistinaho J, Latz E, Halle A, Petzold GC, Town T, Morgan D,  
624 Shinohara ML, Perry VH, Holmes C, Bazan NG, Brooks DJ, Hunot S, Joseph B, Deigendesch N,  
625 Garaschuk O, Boddeke E, Dinarello CA, Breitner JC, Cole GM, Golenbock DT, Kummer MP  
626 (2015) Neuroinflammation in Alzheimer's disease. *The Lancet Neurology* **14**, 388–405.
- 627 [71] Walters A, Phillips E, Zheng R, Biju M, Kuruvilla T (2016) Evidence for neuroinflammation in  
628 Alzheimer's disease: Neuroinflammation in Alzheimer's. *Progress in Neurology and Psychiatry*  
629 **20**, 25–31.
- 630 [72] Chakrabarty P, Li A, Ceballos-Diaz C, Eddy JA, Funk CC, Moore B, DiNunno N, Rosario AM,  
631 Cruz PE, Verbeeck C, Sacino A, Nix S, Janus C, Price ND, Das P, Golde TE (2015) IL-10 Alters  
632 Immunoproteostasis in APP Mice, Increasing Plaque Burden and Worsening Cognitive Behavior.  
633 *Neuron* **85**, 519–533.
- 634 [73] Chakrabarty P, Tianbai L, Herring A, Ceballos-Diaz C, Das P, Golde TE (2012) Hippocampal  
635 expression of murine IL-4 results in exacerbation of amyloid deposition. *Mol Neurodegener* **7**,  
636 36.
- 637 [74] Chakrabarty P, Herring A, Ceballos-Diaz C, Das P, Golde TE (2011) Hippocampal expression of  
638 murine TNF $\alpha$  results in attenuation of amyloid deposition in vivo. *Molecular Neurodegeneration*  
639 **6**, 16.

- 640 [75] Chakrabarty P, Ceballos-Diaz C, Beccard A, Janus C, Dickson D, Golde TE, Das P (2010) IFN-  
641 gamma promotes complement expression and attenuates amyloid plaque deposition in amyloid  
642 beta precursor protein transgenic mice. *J. Immunol.* **184**, 5333–5343.
- 643 [76] Chakrabarty P, Jansen-West K, Beccard A, Ceballos-Diaz C, Levites Y, Verbeeck C, Zubair AC,  
644 Dickson D, Golde TE, Das P (2010) Massive gliosis induced by interleukin-6 suppresses Abeta  
645 deposition in vivo: evidence against inflammation as a driving force for amyloid deposition.  
646 *FASEB J.* **24**, 548–559.
- 647 [77] Ghosh S, Wu MD, Shaftel SS, Kyrkanides S, LaFerla FM, Olschowka JA, O'Banion MK (2013)  
648 Sustained interleukin-1 $\beta$  overexpression exacerbates tau pathology despite reduced amyloid  
649 burden in an Alzheimer's mouse model. *J. Neurosci.* **33**, 5053–5064.
- 650 [78] Guillot-Sestier M-V, Doty KR, Gate D, Rodriguez J, Leung BP, Rezai-Zadeh K, Town T (2015)  
651 IL10 Deficiency Rebalances Innate Immunity to Mitigate Alzheimer-Like Pathology. *Neuron* **85**,  
652 534–548.
- 653 [79] Shaftel SS, Carlson TJ, Olschowka JA, Kyrkanides S, Matousek SB, O'Banion MK (2007)  
654 Chronic interleukin-1beta expression in mouse brain leads to leukocyte infiltration and  
655 neutrophil-independent blood brain barrier permeability without overt neurodegeneration. *J.*  
656 *Neurosci.* **27**, 9301–9309.
- 657 [80] Town T, Laouar Y, Pittenger C, Mori T, Szekely CA, Tan J, Duman RS, Flavell RA (2008)  
658 Blocking TGF- $\beta$ -Smad2/3 innate immune signaling mitigates Alzheimer-like pathology. *Nature*  
659 *Medicine* **14**, 681–687.
- 660 [81] Ferretti MT, Merlini M, Späni C, Gericke C, Schweizer N, Enzmann G, Engelhardt B, Kulic L,  
661 Suter T, Nitsch RM (2016) T-cell brain infiltration and immature antigen-presenting cells in  
662 transgenic models of Alzheimer's disease-like cerebral amyloidosis. *Brain, Behavior, and*  
663 *Immunity* **54**, 211–225.
- 664 [82] Fitten LJ, Ortiz F, Fairbanks L, Bartzokis G, Lu P, Klein E, Coppola G, Ringman J (2014)  
665 Younger age of dementia diagnosis in a Hispanic population in southern California. *Int J Geriatr*  
666 *Psychiatry* **29**, 586–593.
- 667 [83] Mayeda ER, Glymour MM, Quesenberry CP, Whitmer RA (2016) Inequalities in dementia  
668 incidence between six racial and ethnic groups over 14 years. *Alzheimer's & Dementia* **12**, 216–  
669 224.
- 670 [84] Steenland K, Goldstein FC, Levey A, Wharton W (2016) A Meta-Analysis of Alzheimer's  
671 Disease Incidence and Prevalence Comparing African-Americans and Caucasians. *J. Alzheimers*  
672 *Dis.* **50**, 71–76.
- 673 [85] Sharp ES, Gatz M (2011) The Relationship between Education and Dementia An Updated  
674 Systematic Review. *Alzheimer Dis Assoc Disord* **25**, 289–304.
- 675

676 **FIGURE CAPTIONS**

677 **Figure 1.** Marginal mean ( $\pm 95\%$  confidence interval) of **CSF levels** of A. IL-16 (pg/ml), B. IL-8  
678 (pg/ml), C. C-reactive protein (CRP;  $\mu\text{g/ml}$ ), and **plasma levels** of D. CRP (CRP;  $\mu\text{g/ml}$ ), E. IL-  
679 18 (pg/ml), and F. IgE (ng/ml) in ADNI participants by sex and presence or absence of APOE $\epsilon 4$   
680 alleles (none or 1 and 2 alleles).

681  
682 **Figure 2.** Marginal mean ( $\pm 95\%$  confidence interval) of **CSF levels** of A. IL-16 (pg/ml), B.  
683 IgA (mg/ml), C. Intercellular adhesion molecule (ICAM1; ng/ml), and **plasma levels** of D. C-  
684 reactive protein (CRP;  $\mu\text{g/ml}$ ), E. cortisol (ng/ml), and F. IL-16 in ADNI participants by sex and  
685 diagnosis (CN, cognitively normal; LMCI, late mild cognitive impairment; and AD, Alzheimer's  
686 disease).

687  
688 **Figure 3.** Correlations between plasma and CSF levels of A. CD 40, B. ICAM1, C. IL-3, and D.  
689 IgA in males and females separately. CD 40 and ICAM1 were positively correlated in males  
690 while IL-3 was negatively correlated in females. IgA was more strongly correlated in males  
691 compared to females (see Table 5 for details).

692



# Figure 1

## CSF

A

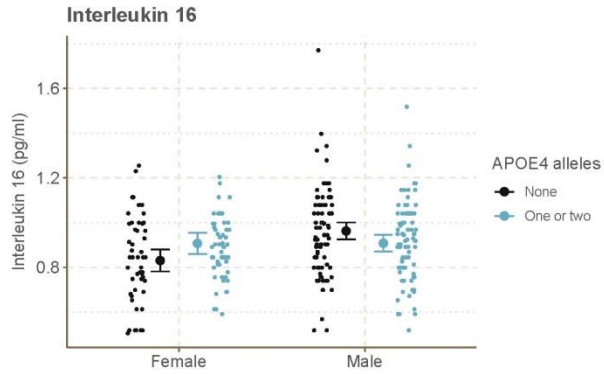

B

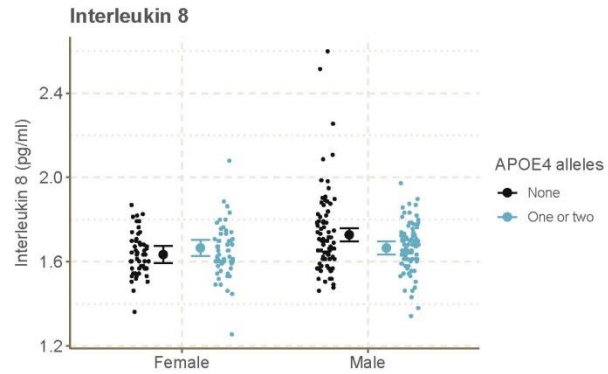

C

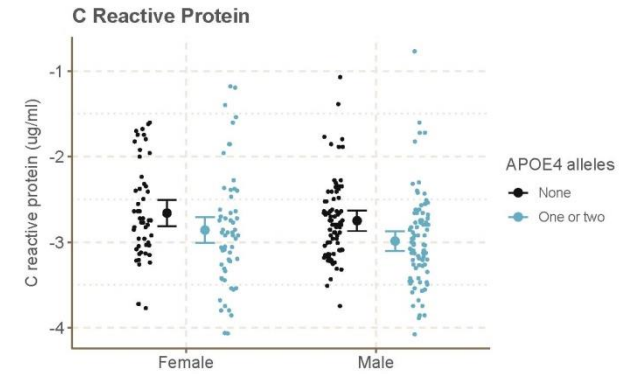

## Plasma

D

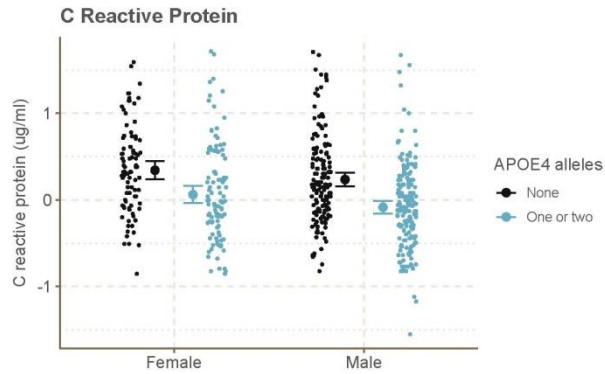

E

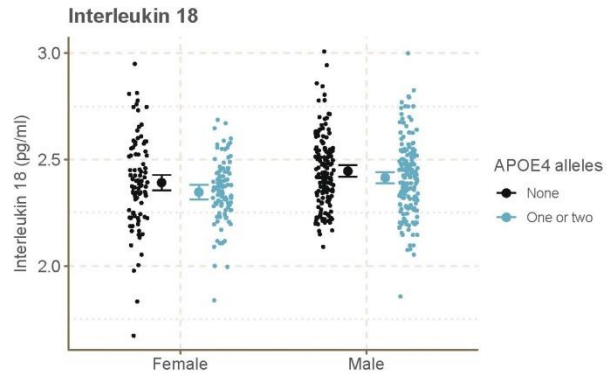

F

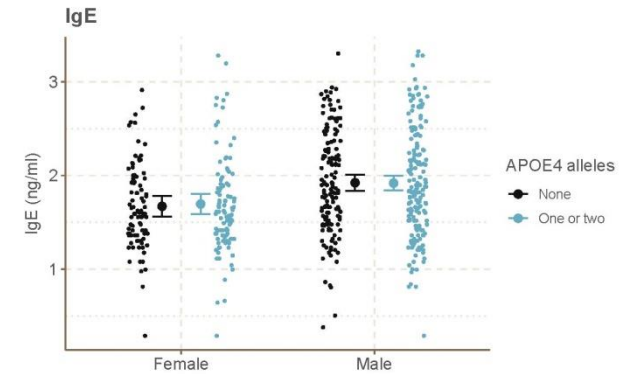

# Figure 2

## CSF

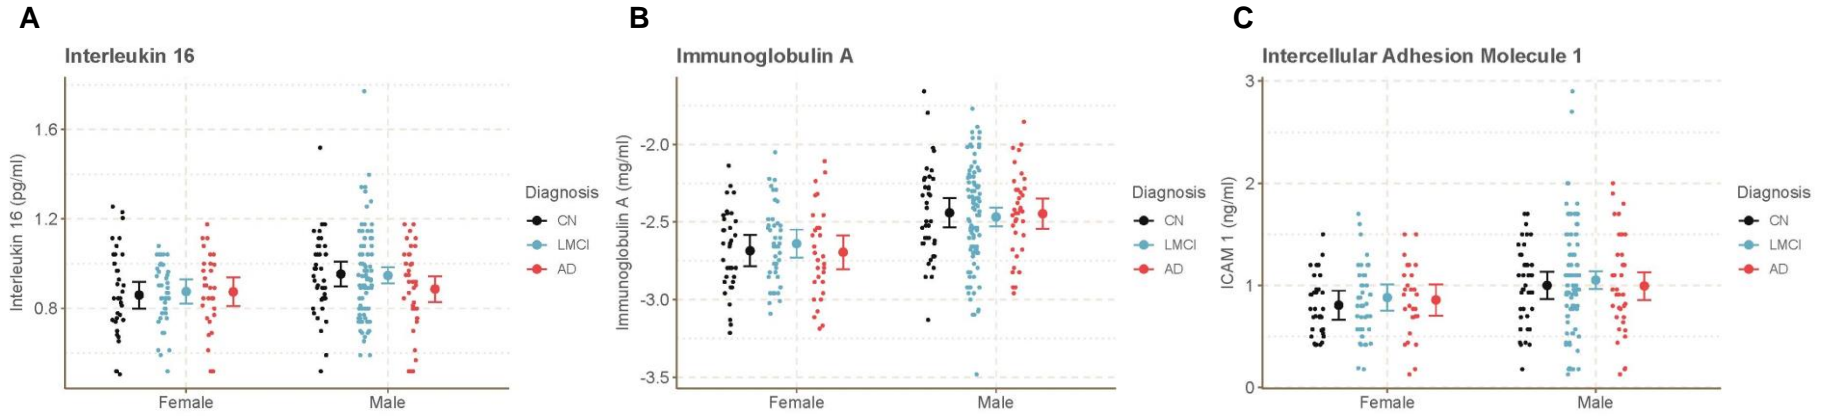

## Plasma

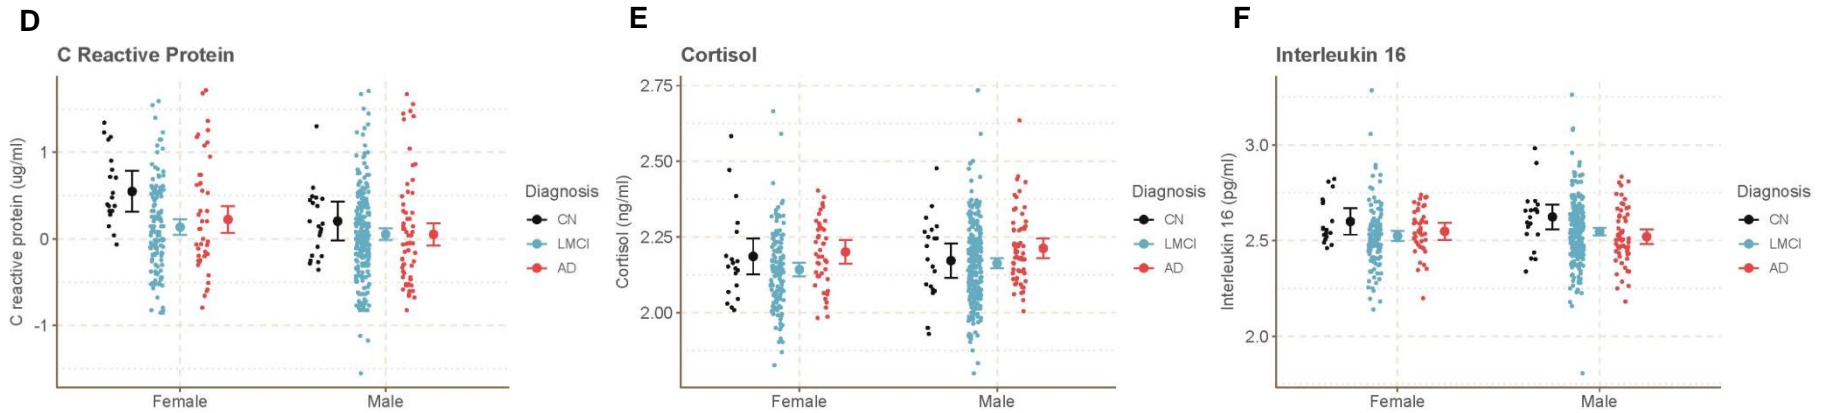

# Figure 3

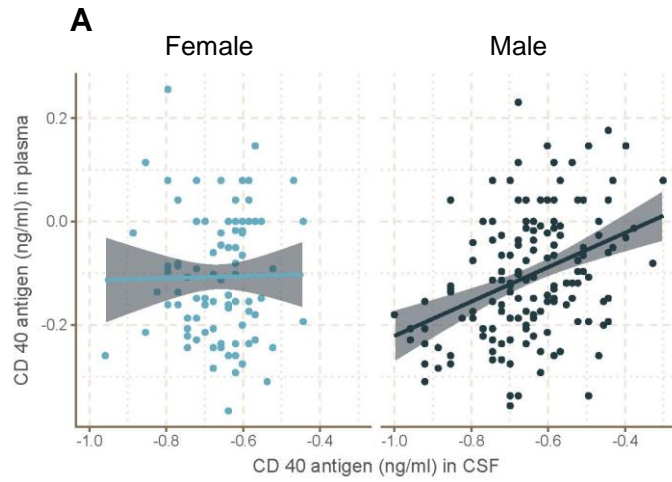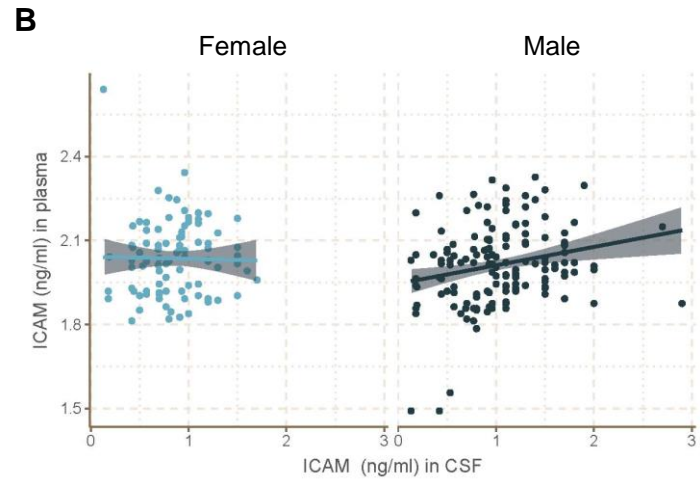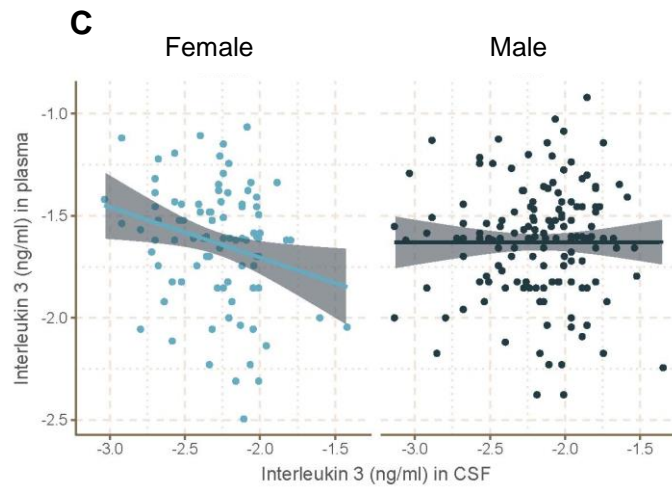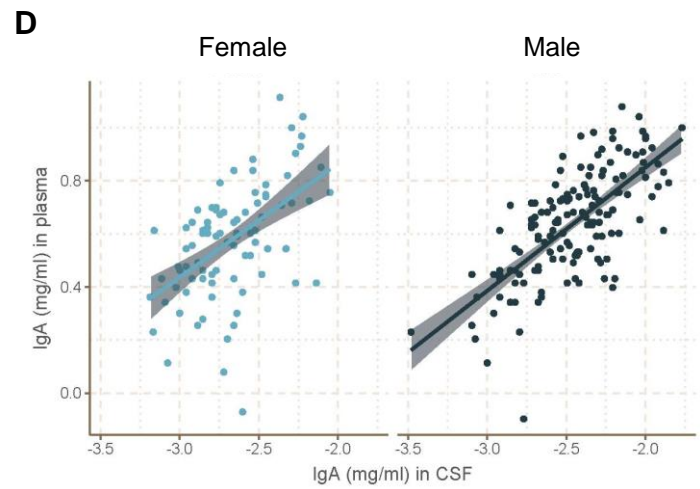

**Table 1.** Demographic and clinical information for all ADNI participants subdivided by sex. Participants with measured biomarkers in (A) cerebrospinal fluid (CSF) and (B) plasma. We collapsed APOE genotype into two groups: (1) participants carrying any  $\epsilon 4$  alleles (homozygous  $\epsilon 4/\epsilon 4$  and heterozygous  $\epsilon 4/-$ ) and (2) participants with no  $\epsilon 4$  risk alleles ( $-/-$ ). In the two subdata sets, females were significantly younger and had fewer years of education than males. In data set A (but not B), there was a trend for the proportion of female and male participants in each of the diagnosis to be different ( $P=0.051$ ) with more females (27.5 % compared to 21.8%) diagnosed with AD, more females cognitively normal (32.1% compared to 22.9%), and fewer females diagnosed with LMCI compared to males (40.4% compared to 55.3%). The proportion of female and male participants carriers and non-carriers of APOE $\epsilon 4$  alleles was not significantly different in any of the two datasets analysed. 85% of individuals with CSF biomarkers (A) had also plasma biomarkers (B). CN, cognitively normal; LMCI, late mild cognitive impairment; AD, Alzheimer's disease.

|                                                  | A. CSF               |                      |                      |          | B. Plasma            |                      |                      |          |
|--------------------------------------------------|----------------------|----------------------|----------------------|----------|----------------------|----------------------|----------------------|----------|
|                                                  | Total                | Sex                  |                      | P-value  | Total                | Sex                  |                      | P-value  |
| No. 279                                          | Female               | Male                 | No. 527              |          | Female               | Male                 |                      |          |
|                                                  | No. 109              | No. 170              |                      | No. 196  | No. 330              |                      |                      |          |
| <b>Age</b>                                       |                      |                      |                      |          |                      |                      |                      |          |
| Mean (SD)                                        | 75.15 ( $\pm 6.86$ ) | 73.75 ( $\pm 6.69$ ) | 76.04 ( $\pm 6.83$ ) | 0.007    | 74.75 ( $\pm 7.40$ ) | 73.79 ( $\pm 7.63$ ) | 75.32 ( $\pm 7.21$ ) | 0.051    |
| <b>Education (years)</b>                         |                      |                      |                      |          |                      |                      |                      |          |
| Mean (SD)                                        | 15.69 ( $\pm 2.95$ ) | 14.68 ( $\pm 2.74$ ) | 16.34 ( $\pm 2.90$ ) | < 0.0001 | 15.57 ( $\pm 3.04$ ) | 14.94 ( $\pm 2.89$ ) | 15.95 ( $\pm 3.07$ ) | < 0.0001 |
| <b>Ethnicity</b>                                 |                      |                      |                      |          |                      |                      |                      |          |
| White                                            | 267 (95.70%)         | 103 (94.50%)         | 164 (96.47%)         | 0.55     | 498 (94.68%)         | 186 (94.90%)         | 312 (94.55%)         | 0.27     |
| Not White <sup>†</sup>                           | 12 (4.30%)           | 6 (5.50%)            | 6 (3.53%)            |          | 28 (5.32%)           | 10 (5.10%)           | 18 (5.45%)           |          |
| <b>Baseline diagnosis</b>                        |                      |                      |                      |          |                      |                      |                      |          |
| CN                                               | 74 (26.5%)           | 35 (32.1%)           | 39 (22.9%)           | 0.051    | 40 (7.6%)            | 19 (9.7%)            | 21 (6.4%)            | 0.16     |
| LMCI                                             | 138 (49.5%)          | 44 (40.4%)           | 94 (55.3%)           |          | 378 (71.9%)          | 132 (67.3%)          | 246 (74.5%)          |          |
| AD                                               | 67 (24.0%)           | 30 (27.5%)           | 37 (21.8%)           |          | 108 (20.5%)          | 45 (23.0%)           | 63 (19.1%)           |          |
| <b>APOE<math>\epsilon 4</math> allele number</b> |                      |                      |                      |          |                      |                      |                      |          |
| 0                                                | 134 (48.03%)         | 51 (46.79%)          | 83 (48.82%)          | 0.81     | 243 (46.20%)         | 90 (45.92%)          | 153 (46.36%)         | 0.93     |
| 1 or 2                                           | 145 (51.97%)         | 58 (53.21%)          | 87 (51.18%)          |          | 283 (53.80%)         | 106 (54.08%)         | 177 (53.64%)         |          |
| <b>Cortisol (ng/mL)</b>                          |                      |                      |                      |          |                      |                      |                      |          |
| Mean (SD)                                        | 16.05 ( $\pm 6.04$ ) | 14.92 ( $\pm 6.01$ ) | 16.78 ( $\pm 5.96$ ) | 0.008    | 2.17 ( $\pm 0.13$ )  | 2.16 ( $\pm 0.13$ )  | 2.17 ( $\pm 0.13$ )  | 0.16     |
| <b>C reactive protein (ug/mL)</b>                |                      |                      |                      |          |                      |                      |                      |          |
| Mean (SD)                                        | -2.83 ( $\pm 0.56$ ) | -2.77 ( $\pm 0.64$ ) | -2.87 ( $\pm 0.51$ ) | 0.23     | 0.12 ( $\pm 0.54$ )  | 0.21 ( $\pm 0.55$ )  | 0.07 ( $\pm 0.52$ )  | 0.003    |
| <b>CD40 antigen (ng/mL)</b>                      |                      |                      |                      |          |                      |                      |                      |          |
| Mean (SD)                                        | -0.65 ( $\pm 0.12$ ) | -0.66 ( $\pm 0.10$ ) | -0.64 ( $\pm 0.14$ ) | 0.12     | -0.12 ( $\pm 0.13$ ) | -0.12 ( $\pm 0.13$ ) | -0.12 ( $\pm 0.14$ ) | 0.87     |
| <b>Interleukin 16 (pg/mL)</b>                    |                      |                      |                      |          |                      |                      |                      |          |
| Mean (SD)                                        | 0.91 ( $\pm 0.18$ )  | 0.87 ( $\pm 0.17$ )  | 0.94 ( $\pm 0.19$ )  | 0.004    | 2.55 ( $\pm 0.15$ )  | 2.54 ( $\pm 0.15$ )  | 2.55 ( $\pm 0.16$ )  | 0.34     |
| <b>Interleukin 3 (ng/mL)</b>                     |                      |                      |                      |          |                      |                      |                      |          |
| Mean (SD)                                        | -2.22 ( $\pm 0.32$ ) | -2.28 ( $\pm 0.29$ ) | -2.17 ( $\pm 0.34$ ) | 0.001    | -1.65 ( $\pm 0.29$ ) | -1.65 ( $\pm 0.29$ ) | -1.65 ( $\pm 0.30$ ) | 0.97     |
| <b>Interleukin 6 receptor (ng/mL)</b>            |                      |                      |                      |          |                      |                      |                      |          |
| Mean (SD)                                        | -0.01 ( $\pm 0.15$ ) | -0.02 ( $\pm 0.14$ ) | -0.00 ( $\pm 0.15$ ) | 0.30     | 1.46 ( $\pm 0.14$ )  | 1.48 ( $\pm 0.14$ )  | .45 ( $\pm 0.13$ )   | 0.02     |
| <b>Interleukin 8 (pg/mL)</b>                     |                      |                      |                      |          |                      |                      |                      |          |
| Mean (SD)                                        | 1.68 ( $\pm 0.15$ )  | 1.64 ( $\pm 0.11$ )  | 1.70 ( $\pm 0.16$ )  | 0.001    | 1.02 ( $\pm 0.19$ )  | 1.02 ( $\pm 0.21$ )  | 1.01 ( $\pm 0.18$ )  | 0.1      |
| <b>Intercellular adhesion molecule 1 (ng/mL)</b> |                      |                      |                      |          |                      |                      |                      |          |
| Mean (SD)                                        | 0.96 ( $\pm 0.44$ )  | 0.83 ( $\pm 0.33$ )  | 1.04 ( $\pm 0.48$ )  | 0.0001   | 2.01 ( $\pm 0.15$ )  | 2.04 ( $\pm 0.14$ )  | 2.00 ( $\pm 0.15$ )  | 0.03     |
| <b>Immunoglobulin A (mg/mL)</b>                  |                      |                      |                      |          |                      |                      |                      |          |
| Mean (SD)                                        | -2.54 ( $\pm 0.31$ ) | -2.68 ( $\pm 0.26$ ) | -2.45 ( $\pm 0.31$ ) | < 0.0001 | 0.61 ( $\pm 0.23$ )  | 0.60 ( $\pm 0.23$ )  | 0.62 ( $\pm 0.22$ )  | 0.21     |

P-values are from Wilcoxon rank sum tests for continuous variables and Fisher's exact tests for categorical variables. Includes self-reported Black, Asian, American Indian/Alaskan, and >1 ethnicity.

**Table 2.** List of biomarkers analysed in the current study with their main biological function and main finding in the CSF and plasma. Main effects of sex (sex difference), APOE $\epsilon$ 4 genotype (non-carriers or carriers), and diagnosis (CN, cognitively normal; LMCI, late mild cognitive impairment; AD, Alzheimer's disease) and interaction between sex and APOE $\epsilon$ 4 genotype (sex \* APOE $\epsilon$ 4 genotype) are shown. Significant effects are adjusted  $P \leq 0.05$  and trends are adjusted  $P \leq 0.08$ . See results for details. n/a - not available

| <b>Biomarker</b>                         | <b>Biological function</b>             | <b>Results in CSF</b>                                                                                     | <b>Results in Plasma</b>                                                                              |
|------------------------------------------|----------------------------------------|-----------------------------------------------------------------------------------------------------------|-------------------------------------------------------------------------------------------------------|
| <b>Cortisol</b>                          | Stress hormone and inflammation        | Sex difference (trend):<br>$\text{♀} < \text{♂}$                                                          | Diagnosis:<br>LMCI < AD                                                                               |
| <b>Intercellular adhesion molecule 1</b> | Immune response, immunoglobulin family | Sex difference:<br>$\text{♀} < \text{♂}$                                                                  | Sex difference: $\text{♀} > \text{♂}$<br>Sex difference: $\text{♀} > \text{♂}$                        |
| <b>C-reactive protein</b>                | Inflammation                           | APOE $\epsilon$ 4 genotype:<br>non-carriers > carriers                                                    | APOE $\epsilon$ 4 genotype:<br>non-carriers > carriers<br>Diagnosis (trend):<br>CN > LMCI and CN > AD |
| <b>CD40 antigen</b>                      | Immune and inflammatory responses      |                                                                                                           | Diagnosis (trend):<br>LMCI < AD                                                                       |
| <b>Interleukin 3</b>                     | Immune and inflammatory responses      |                                                                                                           |                                                                                                       |
| <b>Interleukin 6 receptor</b>            | Immune and inflammatory responses      | APOE $\epsilon$ 4 genotype (trend):<br>non-carriers < carriers                                            |                                                                                                       |
| <b>Interleukin 8</b>                     | Immune and inflammatory responses      | Sex * APOE $\epsilon$ 4 genotype:<br>non-carriers $\text{♀} < \text{♂}$<br>carriers $\text{♀} = \text{♂}$ |                                                                                                       |
| <b>Interleukin 16</b>                    | Immune and inflammatory responses      | Sex * APOE $\epsilon$ 4 genotype:<br>non-carriers $\text{♀} < \text{♂}$<br>carriers $\text{♀} = \text{♂}$ | Diagnosis (trend):<br>CN > LMCI<br>CN > AD                                                            |
| <b>Immunoglobulin A</b>                  | Immune and inflammatory responses      | Sex difference: $\text{♀} < \text{♂}$                                                                     |                                                                                                       |
| <b>Interleukin 18</b>                    | Immune and inflammatory responses      | n/a                                                                                                       | Sex difference: $\text{♀} < \text{♂}$                                                                 |
| <b>Immunoglobulin E</b>                  | Immune and inflammatory responses      | n/a                                                                                                       | Sex difference: $\text{♀} < \text{♂}$                                                                 |

**Table 3.** Linear regression results for models with sex and APOE genotype (non-carriers or carriers of 1 or 2 APOEε4 alleles). P-values are for overall tests and are FDR-adjusted. Only shown are the models with significant associations (adjusted P≤0.05) and trends (adjusted P≤0.08). All model summaries are available in Supplementary Table S1.

| Predictors                               | Cortisol Cortisol ng/ml |       |             | C Reactive Protein ug/ml |       |              | Interleukin 16 pg/ml  |       |              | Interleukin 6 receptor ng/ml |       |              | Interleukin 8 pg/ml   |              |              | Immunoglobulin A mg/ml |        |                  | Intercellular Adhesion Molecule ng/ml |       |              |
|------------------------------------------|-------------------------|-------|-------------|--------------------------|-------|--------------|-----------------------|-------|--------------|------------------------------|-------|--------------|-----------------------|--------------|--------------|------------------------|--------|------------------|---------------------------------------|-------|--------------|
|                                          | Estimates (CI)          | p     | adjusted p  | Estimates (CI)           | p     | adjusted p   | Estimates (CI)        | p     | adjusted p   | Estimates (CI)               | p     | adjusted p   | Estimates (CI)        | p            | adjusted p   | Estimates (CI)         | p      | adjusted p       | Estimates (CI)                        | p     | adjusted p   |
| (Intercept)                              | 1.43 (-7.00 – 9.87)     |       |             | -3.03 (-3.84 – -2.23)    |       |              | 0.42 (0.15 – 0.68)    |       |              | -0.27 (-0.48 – -0.06)        |       |              | 1.33 (1.11 – 1.54)    |              |              | -2.91 (-3.35 – -2.48)  |        |                  | -0.23 (-0.83 – 0.38)                  |       |              |
| AGE (years)                              | 0.22 (0.12 – 0.32)      |       |             | 0.01 (-0.00 – 0.02)      |       |              | 0.01 (0.00 – 0.01)    |       |              | 0.00 (0.00 – 0.01)           |       |              | 0.00 (0.00 – 0.01)    |              |              | 0.00 (-0.00 – 0.01)    |        |                  | 0.01 (0.01 – 0.02)                    |       |              |
| EDUCATION (years)                        | -0.21 (-0.45 – 0.03)    |       |             | -0.01 (-0.03 – 0.02)     |       |              | -0.01 (-0.01 – 0.00)  |       |              | -0.00 (-0.01 – 0.00)         |       |              | 0.00 (-0.00 – 0.01)   |              |              | 0.00 (-0.01 – 0.01)    |        |                  | -0.00 (-0.02 – 0.02)                  |       |              |
| Male (ref = Female)                      | 1.72 (0.25 – 3.19)      | 0.022 | <b>0.07</b> | -0.11 (-0.25 – 0.03)     | 0.126 | 0.22         | 0.13 (0.07 – 0.19)    |       |              | 0.02 (-0.02 – 0.05)          | 0.372 | 0.5          | 0.09 (0.04 – 0.14)    | <0.001       |              | 0.21 (0.14 – 0.29)     | <0.001 | <b>&lt;0.001</b> | 0.18 (0.07 – 0.28)                    | 0.001 | <b>0.009</b> |
| APOE4 1 or 2 alleles (ref = 0 alleles)   | 0.82 (-0.55 – 2.19)     | 0.241 | 0.35        | -0.22 (-0.35 – -0.09)    | 0.001 | <b>0.009</b> | 0.08 (0.01 – 0.14)    |       |              | 0.04 (0.00 – 0.07)           | 0.025 | <b>0.071</b> | 0.03 (-0.02 – 0.09)   | 0.261        |              | -0.00 (-0.07 – 0.07)   | 0.898  | 0.97             | 0.08 (-0.02 – 0.18)                   | 0.128 | 0.22         |
| Interaction: Male by 1 or 2 alleles      |                         |       |             |                          |       |              | -0.13 (-0.22 – -0.05) | 0.003 | <b>0.016</b> |                              |       |              | -0.09 (-0.16 – -0.02) | <b>0.008</b> | <b>0.035</b> |                        |        |                  |                                       |       |              |
| Observations                             | 279                     |       |             | 279                      |       |              | 279                   |       |              | 279                          |       |              | 279                   |              |              | 279                    |        |                  | 279                                   |       |              |
| R <sup>2</sup> / adjusted R <sup>2</sup> | 0.095 / 0.082           |       |             | 0.055 / 0.042            |       |              | 0.122 / 0.106         |       |              | 0.046 / 0.032                |       |              | 0.092 / 0.076         |              |              | 0.123 / 0.111          |        |                  | 0.105 / 0.092                         |       |              |

**Table 4.** Linear regression results for models with sex and baseline diagnosis (CN, cognitively normal; LMCI, late mild cognitive impairment; AD, Alzheimer’s disease). Only shown are the models with significant associations (adjusted  $P \leq 0.05$ ) and trends (adjusted  $P \leq 0.08$ ). P-values are for overall tests and are FDR-adjusted. All model summaries are available in Supplementary Table S2. There were no significant interactions between diagnosis and sex.

| <i>Predictors</i>                        | <b>Interleukin 16 pg/ml</b> |          |                   | <b>Immunoglobulin A mg/ml</b> |          |                   | <b>Intercellular Adhesion Molecule ng/ml</b> |          |                   |
|------------------------------------------|-----------------------------|----------|-------------------|-------------------------------|----------|-------------------|----------------------------------------------|----------|-------------------|
|                                          | <i>Estimates (CI)</i>       | <i>p</i> | <i>adjusted p</i> | <i>Estimates (CI)</i>         | <i>p</i> | <i>adjusted p</i> | <i>Estimates (CI)</i>                        | <i>p</i> | <i>adjusted p</i> |
| (Intercept)                              | 0.51 (0.26 – 0.77)          |          |                   | -2.92 (-3.35 – -2.48)         |          |                   | -0.19 (-0.80 – 0.42)                         |          |                   |
| AGE (years)                              | 0.01 (0.00 – 0.01)          |          |                   | 0.00 (-0.00 – 0.01)           |          |                   | 0.01 (0.01 – 0.02)                           |          |                   |
| EDUCATION (years)                        | -0.01 (-0.01 – 0.00)        |          |                   | 0.00 (-0.01 – 0.01)           |          |                   | -0.00 (-0.02 – 0.02)                         |          |                   |
| Male (ref = Female)                      | 0.06 (0.02 – 0.11)          | 0.007    | <b>0.055</b>      | 0.21 (0.14 – 0.29)            | <0.001   | <b>&lt;0.001</b>  | 0.17 (0.06 – 0.28)                           | 0.002    | <b>0.026</b>      |
| Diagnosis (ref = CN)                     |                             | 0.4      | 0.61              |                               | 0.99     | 0.99              |                                              | 0.54     | 0.67              |
| LMCI                                     | 0.01 (-0.05 – 0.06)         |          |                   | 0.00 (-0.08 – 0.09)           |          |                   | 0.06 (-0.06 – 0.18)                          |          |                   |
| AD                                       | -0.03 (-0.09 – 0.03)        |          |                   | -0.01 (-0.11 – 0.09)          |          |                   | 0.02 (-0.12 – 0.16)                          |          |                   |
| Observations                             | 279                         |          |                   | 279                           |          |                   | 279                                          |          |                   |
| R <sup>2</sup> / adjusted R <sup>2</sup> | 0.099 / 0.082               |          |                   | 0.124 / 0.107                 |          |                   | 0.101 / 0.085                                |          |                   |

**Table 5.** Pearson's correlations between plasma and CSF levels of the biomarkers analysed in the current study separately in males and females. Differences in the correlations were determined using confidence intervals. Significant correlations and differences between correlations are  $P \leq 0.05$  and trends are  $P \leq 0.08$

|                    | <b>Correlation (r) in<br/>Males n = 149</b> | <b>P-value</b>     | <b>Correlation (r) in<br/>Females n = 88</b> | <b>P-value</b>     | <b>Difference (95% CI)</b> | <b>P-value</b> |
|--------------------|---------------------------------------------|--------------------|----------------------------------------------|--------------------|----------------------------|----------------|
| Cortisol           | 0.176                                       | <b>0.032</b>       | 0.327                                        | <b>0.002</b>       | -0.151 (-0.388-0.101)      | 0.24           |
| C reactive protein | 0.793                                       | <b>&lt; 0.0001</b> | 0.860                                        | <b>&lt; 0.0001</b> | -0.067 (-0.149-0.019)      | 0.12           |
| CD40 antigen       | 0.374                                       | <b>&lt; 0.0001</b> | 0.016                                        | 0.88               | 0.358 (0.103-0.606)        | <b>0.01</b>    |
| IL-16              | 0.156                                       | <b>0.058</b>       | 0.290                                        | <b>0.006</b>       | -0.134 (-0.376-0.121)      | 0.30           |
| IL-3               | 0.001                                       | 0.989              | -0.246                                       | <b>0.021</b>       | 0.247 (-0.016-0.493)       | <b>0.06</b>    |
| IL-6 receptor      | 0.459                                       | <b>&lt; 0.0001</b> | 0.493                                        | <b>&lt; 0.0001</b> | -0.034 (-0.232-0.179)      | 0.75           |
| IL-8               | 0.138                                       | 0.093              | 0.287                                        | <b>0.007</b>       | -0.149 (-0.392-0.107)      | 0.25           |
| IgA                | 0.705                                       | <b>&lt; 0.0001</b> | 0.529                                        | <b>&lt; 0.0001</b> | 0.176 (0.012-0.361)        | <b>0.03</b>    |
| ICAM1              | 0.231                                       | <b>0.005</b>       | -0.021                                       | 0.849              | 0.252 (-0.011-0.507)       | <b>0.06</b>    |



## Supplemental File

### Inflammation in Alzheimer's disease: do sex and APOE matter?

Paula Duarte-Guterman<sup>1</sup>, Arianne Y. Albert<sup>2</sup>, Amy M. Inkster<sup>3,4</sup>, Cindy K. Barha<sup>5</sup>, Liisa A.M. Galea<sup>1</sup>, on behalf of the Alzheimer's Disease Neuroimaging Initiative<sup>δ</sup>

1. Djavad Mowafaghian Centre for Brain Health and Department of Psychology, University of British Columbia, Vancouver, BC, Canada
2. Women's Health Research Institute of British Columbia, Vancouver, BC, Canada
3. Department of Medical Genetics, University of British Columbia, Vancouver, BC, Canada.
4. BC Children's Hospital Research Institute, Vancouver, BC, Canada
5. Djavad Mowafaghian Centre for Brain Health and Department of Physical Therapy, University of British Columbia, Vancouver, BC, Canada

Address all correspondence and requests for reprints to:

L. A. M. Galea, PhD  
Djavad Mowafaghian Centre for Brain Health  
2215 Wesbrook Mall  
Vancouver, British Columbia  
V6T 1Z3, Canada  
E-mail: [lgalea@psych.ubc.ca](mailto:lgalea@psych.ubc.ca).

<sup>δ</sup> Data used in preparation of this article were obtained from the Alzheimer's Disease Neuroimaging Initiative (ADNI) database ([adni.loni.usc.edu](http://adni.loni.usc.edu)). As such, the investigators within the ADNI contributed to the design and implementation of ADNI and/or provided data but did not participate in analysis or writing of this report. A complete listing of ADNI investigators can be found at: [http://adni.loni.usc.edu/wp-content/uploads/how\\_to\\_apply/ADNI\\_Acknowledgement\\_List.pdf](http://adni.loni.usc.edu/wp-content/uploads/how_to_apply/ADNI_Acknowledgement_List.pdf)

**Table S1.** Linear regression results for all CSF variables investigated by sex and APOE genotype (non-carriers or carriers of APOEε4 alleles).

| Predictors                               | Cortisol Cortisol ng/ml |       |             | C Reactive Protein ug/ml |       |              | CD 40 antigen ng/ml   |       |            | Interleukin 16 pg/ml  |       |              | Interleukin 3 ng/ml   |       |            |
|------------------------------------------|-------------------------|-------|-------------|--------------------------|-------|--------------|-----------------------|-------|------------|-----------------------|-------|--------------|-----------------------|-------|------------|
|                                          | Estimates (CI)          | p     | adjusted p  | Estimates (CI)           | p     | adjusted p   | Estimates (CI)        | p     | adjusted p | Estimates (CI)        | p     | adjusted p   | Estimates (CI)        | p     | adjusted p |
| (Intercept)                              | 1.43 (-7.00 – 9.87)     |       |             | -3.03 (-3.84 – -2.23)    |       |              | -1.10 (-1.27 – -0.93) |       |            | 0.42 (0.15 – 0.68)    |       |              | -3.03 (-3.49 – -2.57) |       |            |
| AGE (years)                              | 0.22 (0.12 – 0.32)      |       |             | 0.01 (-0.00 – 0.02)      |       |              | 0.01 (0.00 – 0.01)    |       |            | 0.01 (0.00 – 0.01)    |       |              | 0.01 (0.00 – 0.02)    |       |            |
| EDUCATION (years)                        | -0.21 (-0.45 – 0.03)    |       |             | -0.01 (-0.03 – 0.02)     |       |              | -0.00 (-0.01 – 0.00)  |       |            | -0.01 (-0.01 – 0.00)  |       |              | 0.00 (-0.01 – 0.01)   |       |            |
| Male (ref = Female)                      | 1.72 (0.25 – 3.19)      | 0.022 | <b>0.07</b> | -0.11 (-0.25 – 0.03)     | 0.126 | 0.22         | 0.01 (-0.02 – 0.04)   | 0.432 | 0.55       | 0.13 (0.07 – 0.19)    |       |              | 0.08 (-0.00 – 0.16)   | 0.057 | 0.15       |
| APOE4 1 or 2 alleles (ref = 0 alleles)   | 0.82 (-0.55 – 2.19)     | 0.241 | 0.35        | -0.22 (-0.35 – -0.09)    | 0.001 | <b>0.009</b> | 0.01 (-0.02 – 0.04)   | 0.59  | 0.72       | 0.08 (0.01 – 0.14)    |       |              | -0.04 (-0.12 – 0.03)  | 0.262 | 0.37       |
| Interaction: Male by 1 or 2 alleles      |                         |       |             |                          |       |              |                       |       |            | -0.13 (-0.22 – -0.05) | 0.003 | <b>0.016</b> |                       |       |            |
| Observations                             | 279                     |       |             | 279                      |       |              | 279                   |       |            | 279                   |       |              | 279                   |       |            |
| R <sup>2</sup> / adjusted R <sup>2</sup> | 0.095 / 0.082           |       |             | 0.055 / 0.042            |       |              | 0.125 / 0.112         |       |            | 0.122 / 0.106         |       |              | 0.076 / 0.063         |       |            |

**Table S1.** Continued

| Predictors                               | Interleukin 6 receptor ng/ml |       |              | Interleukin 8 pg/ml   |        |              | Immunoglobulin A mg/ml |        |                | Intercellular Adhesion Molecule ng/ml |       |              |
|------------------------------------------|------------------------------|-------|--------------|-----------------------|--------|--------------|------------------------|--------|----------------|---------------------------------------|-------|--------------|
|                                          | Estimates (CI)               | p     | adjusted p   | Estimates (CI)        | p      | adjusted p   | Estimates (CI)         | p      | adjusted p     | Estimates (CI)                        | p     | adjusted p   |
| (Intercept)                              | -0.27 (-0.48 – -0.06)        |       |              | 1.33 (1.11 – 1.54)    |        |              | -2.91 (-3.35 – -2.48)  |        |                | -0.23 (-0.83 – 0.38)                  |       |              |
| AGE (years)                              | 0.00 (0.00 – 0.01)           |       |              | 0.00 (0.00 – 0.01)    |        |              | 0.00 (-0.00 – 0.01)    |        |                | 0.01 (0.01 – 0.02)                    |       |              |
| EDUCATION (years)                        | -0.00 (-0.01 – 0.00)         |       |              | 0.00 (-0.00 – 0.01)   |        |              | 0.00 (-0.01 – 0.01)    |        |                | -0.00 (-0.02 – 0.02)                  |       |              |
| Male (ref = Female)                      | 0.02 (-0.02 – 0.05)          | 0.372 | 0.5          | 0.09 (0.04 – 0.14)    | <0.001 |              | 0.21 (0.14 – 0.29)     | <0.001 | < <b>0.001</b> | 0.18 (0.07 – 0.28)                    | 0.001 | <b>0.009</b> |
| APOE4 1 or 2 alleles (ref = 0 alleles)   | 0.04 (0.00 – 0.07)           | 0.025 | <b>0.071</b> | 0.03 (-0.02 – 0.09)   | 0.261  |              | -0.00 (-0.07 – 0.07)   | 0.898  | 0.97           | 0.08 (-0.02 – 0.18)                   | 0.128 | 0.22         |
| Interaction: Male by 1 or 2 alleles      |                              |       |              | -0.09 (-0.16 – -0.02) | 0.008  | <b>0.035</b> |                        |        |                |                                       |       |              |
| Observations                             | 279                          |       |              | 279                   |        |              | 279                    |        |                | 279                                   |       |              |
| R <sup>2</sup> / adjusted R <sup>2</sup> | 0.046 / 0.032                |       |              | 0.092 / 0.076         |        |              | 0.123 / 0.111          |        |                | 0.105 / 0.092                         |       |              |

**Table S2.** Linear regression results for all CSF variables investigated by sex and baseline diagnosis (CN, cognitively normal; LMCI, late mild cognitive impairment; AD, Alzheimer's disease). There were no significant interactions between diagnosis and sex.

| Predictors                               | Cortisol Cortisol ng/ml |       |            | C Reactive Protein ug/ml |      |            | CD 40 antigen ng/ml   |       |            | Interleukin 16 pg/ml |       |              | Interleukin 3 ng/ml   |       |            |
|------------------------------------------|-------------------------|-------|------------|--------------------------|------|------------|-----------------------|-------|------------|----------------------|-------|--------------|-----------------------|-------|------------|
|                                          | Estimates (CI)          | p     | adjusted p | Estimates (CI)           | p    | adjusted p | Estimates (CI)        | p     | adjusted p | Estimates (CI)       | p     | adjusted p   | Estimates (CI)        | p     | adjusted p |
| (Intercept)                              | 1.49 (-6.96 – 9.95)     |       |            | -3.12 (-3.94 – -2.30)    |      |            | -1.08 (-1.25 – -0.91) |       |            | 0.51 (0.26 – 0.77)   |       |              | -3.03 (-3.49 – -2.57) |       |            |
| AGE (years)                              | 0.22 (0.12 – 0.32)      |       |            | 0.01 (-0.00 – 0.02)      |      |            | 0.01 (0.00 – 0.01)    |       |            | 0.01 (0.00 – 0.01)   |       |              | 0.01 (0.00 – 0.02)    |       |            |
| EDUCATION (years)                        | -0.23 (-0.47 – 0.01)    |       |            | -0.00 (-0.03 – 0.02)     |      |            | -0.00 (-0.01 – 0.00)  |       |            | -0.01 (-0.01 – 0.00) |       |              | 0.00 (-0.01 – 0.01)   |       |            |
| Male (ref = Female)                      | 1.55 (0.07 – 3.04)      | 0.041 | 0.18       | -0.10 (-0.24 – 0.05)     | 0.19 | 0.42       | 0.01 (-0.02 – 0.04)   | 0.51  | 0.65       | 0.06 (0.02 – 0.11)   | 0.007 | <b>0.055</b> | 0.08 (-0.00 – 0.16)   | 0.052 | 0.18       |
| Diagnosis (ref = CN)                     |                         | 0.24  | 0.49       |                          | 0.15 | 0.36       |                       | 0.067 | 0.2        |                      | 0.4   | 0.61         |                       | 0.5   | 0.65       |
| LMCI                                     | 1.23 (-0.43 – 2.88)     |       |            | -0.15 (-0.31 – 0.01)     |      |            | 0.01 (-0.03 – 0.04)   |       |            | 0.01 (-0.05 – 0.06)  |       |              | -0.04 (-0.13 – 0.05)  |       |            |
| AD                                       | 0.10 (-1.83 – 2.02)     |       |            | -0.15 (-0.34 – 0.03)     |      |            | -0.03 (-0.07 – 0.00)  |       |            | -0.03 (-0.09 – 0.03) |       |              | -0.06 (-0.17 – 0.04)  |       |            |
| Observations                             | 279                     |       |            | 279                      |      |            | 279                   |       |            | 279                  |       |              | 279                   |       |            |
| R <sup>2</sup> / adjusted R <sup>2</sup> | 0.100 / 0.084           |       |            | 0.030 / 0.012            |      |            | 0.141 / 0.125         |       |            | 0.099 / 0.082        |       |              | 0.077 / 0.060         |       |            |

**Table S2.** Continued

| Predictors                               | Interleukin 6 receptor ng/ml |      |            | Interleukin 8 pg/ml |       |            | Immunoglobulin A mg/ml |        |                  | Intercellular Adhesion Molecule ng/ml |       |              |
|------------------------------------------|------------------------------|------|------------|---------------------|-------|------------|------------------------|--------|------------------|---------------------------------------|-------|--------------|
|                                          | Estimates (CI)               | p    | adjusted p | Estimates (CI)      | p     | adjusted p | Estimates (CI)         | p      | adjusted p       | Estimates (CI)                        | p     | adjusted p   |
| (Intercept)                              | -0.22 (-0.43 – -0.01)        |      |            | 1.35 (1.14 – 1.56)  |       |            | -2.92 (-3.35 – -2.48)  |        |                  | -0.19 (-0.80 – 0.42)                  |       |              |
| AGE (years)                              | 0.00 (0.00 – 0.01)           |      |            | 0.00 (0.00 – 0.01)  |       |            | 0.00 (-0.00 – 0.01)    |        |                  | 0.01 (0.01 – 0.02)                    |       |              |
| EDUCATION (years)                        | -0.00 (-0.01 – 0.00)         |      |            | 0.00 (-0.00 – 0.01) |       |            | 0.00 (-0.01 – 0.01)    |        |                  | -0.00 (-0.02 – 0.02)                  |       |              |
| Male (ref = Female)                      | 0.02 (-0.02 – 0.05)          | 0.42 | 0.61       | 0.04 (0.01 – 0.08)  | 0.019 | 0.12       | 0.21 (0.14 – 0.29)     | <0.001 | <b>&lt;0.001</b> | 0.17 (0.06 – 0.28)                    | 0.002 | <b>0.026</b> |
| Diagnosis (ref = CN)                     |                              | 0.46 | 0.65       |                     | 0.85  | 0.96       |                        | 0.99   | 0.99             |                                       | 0.54  | 0.67         |
| LMCI                                     | 0.01 (-0.04 – 0.05)          |      |            | 0.01 (-0.03 – 0.05) |       |            | 0.00 (-0.08 – 0.09)    |        |                  | 0.06 (-0.06 – 0.18)                   |       |              |
| AD                                       | -0.02 (-0.07 – 0.03)         |      |            | 0.01 (-0.03 – 0.06) |       |            | -0.01 (-0.11 – 0.09)   |        |                  | 0.02 (-0.12 – 0.16)                   |       |              |
| Observations                             | 279                          |      |            | 279                 |       |            | 279                    |        |                  | 279                                   |       |              |
| R <sup>2</sup> / adjusted R <sup>2</sup> | 0.034 / 0.016                |      |            | 0.062 / 0.045       |       |            | 0.124 / 0.107          |        |                  | 0.101 / 0.085                         |       |              |

**Table S3.** Linear regression results for all plasma variables investigated by sex and APOE genotype (non-carriers or carriers of APOEε4 alleles).

| Predictors                               | Cortisol ng/ml       |      |            | C Reactive Protein ug/ml |        |                  | CD 40 antigen ng/ml   |              |            | Interleukin 16 pg/ml  |      |            | Interleukin 3 ng/ml   |      |            |
|------------------------------------------|----------------------|------|------------|--------------------------|--------|------------------|-----------------------|--------------|------------|-----------------------|------|------------|-----------------------|------|------------|
|                                          | Estimates (CI)       | p    | adjusted p | Estimates (CI)           | p      | adjusted p       | Estimates (CI)        | p            | adjusted p | Estimates (CI)        | p    | adjusted p | Estimates (CI)        | p    | adjusted p |
| (Intercept)                              | 2.06 (1.92 – 2.19)   |      |            | 0.46 (-0.05 – 0.97)      |        |                  | -0.52 (-0.65 – -0.39) |              |            | 2.42 (2.27 – 2.58)    |      |            | -1.86 (-2.16 – -1.57) |      |            |
| AGE (years)                              | 0.00 (-0.00 – 0.00)  |      |            | 0.00 (-0.00 – 0.01)      |        |                  | 0.01 (0.00 – 0.01)    |              |            | 0.00 (0.00 – 0.00)    |      |            | 0.00 (-0.00 – 0.00)   |      |            |
| EDUCATION (years)                        | -0.00 (-0.00 – 0.00) |      |            | -0.03 (-0.04 – -0.01)    |        |                  | -0.00 (-0.01 – 0.00)  |              |            | -0.01 (-0.01 – -0.00) |      |            | 0.01 (0.00 – 0.02)    |      |            |
| Male (ref = Female)                      | 0.01 (-0.01 – 0.04)  | 0.26 | 0.57       | -0.13 (-0.22 – -0.04)    | 0.006  | <b>0.048</b>     | -0.04 (-0.07 – -0.01) |              |            | 0.01 (-0.02 – 0.04)   | 0.50 | 0.79       | -0.02 (-0.07 – 0.04)  | 0.57 | 0.8        |
| APOE4 1 or 2 alleles (ref = 0 alleles)   | 0.02 (-0.00 – 0.04)  | 0.11 | 0.29       | -0.31 (-0.39 – -0.22)    | <0.001 | <b>&lt;0.001</b> | -0.03 (-0.07 – 0.00)  |              |            | -0.01 (-0.04 – 0.01)  | 0.31 | 0.66       | 0.02 (-0.03 – 0.07)   | 0.43 | 0.67       |
| Interaction: Male by 1 or 2 alleles      |                      |      |            |                          |        |                  | 0.05 (0.01 – 0.10)    | <b>0.022</b> | 0.11       |                       |      |            |                       |      |            |
| Observations                             | 527                  |      |            | 526                      |        |                  | 527                   |              |            | 527                   |      |            | 527                   |      |            |
| R <sup>2</sup> / adjusted R <sup>2</sup> | 0.013 / 0.005        |      |            | 0.123 / 0.117            |        |                  | 0.126 / 0.118         |              |            | 0.042 / 0.033         |      |            | 0.011 / 0.004         |      |            |

**Table S3.** Continued

| Predictors                               | Interleukin 6 receptor ng/ml |       |            | Interleukin 8 pg/ml   |       |            | Immunoglobulin A mg/ml |       |            | Intercellular Adhesion Molecule ng/ml |       |              | Interleukin 18 pg/ml  |        |              | Immunoglobulin E ng/ml |        |                  |
|------------------------------------------|------------------------------|-------|------------|-----------------------|-------|------------|------------------------|-------|------------|---------------------------------------|-------|--------------|-----------------------|--------|--------------|------------------------|--------|------------------|
|                                          | Estimates (CI)               | p     | adjusted p | Estimates (CI)        | p     | adjusted p | Estimates (CI)         | p     | adjusted p | Estimates (CI)                        | p     | adjusted p   | Estimates (CI)        | p      | adjusted p   | Estimates (CI)         | p      | adjusted p       |
| (Intercept)                              | 1.43 (1.29 – 1.57)           |       |            | 0.79 (0.60 – 0.99)    |       |            | 0.48 (0.25 – 0.71)     |       |            | 1.89 (1.75 – 2.04)                    |       |              | 2.42 (2.24 – 2.59)    |        |              | 1.42 (0.88 – 1.97)     |        |                  |
| AGE (years)                              | 0.00 (-0.00 – 0.00)          |       |            | 0.00 (0.00 – 0.01)    |       |            | 0.00 (-0.00 – 0.00)    |       |            | 0.00 (0.00 – 0.00)                    |       |              | -0.00 (-0.00 – 0.00)  |        |              | 0.00 (-0.00 – 0.01)    |        |                  |
| EDUCATION (years)                        | -0.00 (-0.01 – 0.00)         |       |            | 0.00 (-0.00 – 0.01)   |       |            | -0.00 (-0.01 – 0.01)   |       |            | 0.00 (-0.00 – 0.00)                   |       |              | -0.00 (-0.01 – 0.00)  |        |              | 0.01 (-0.01 – 0.02)    |        |                  |
| Male (ref = Female)                      | -0.02 (-0.05 – -0.00)        | 0.049 | 0.14       | -0.05 (-0.10 – 0.00)  |       |            | 0.02 (-0.02 – 0.06)    | 0.371 | 0.67       | -0.04 (-0.06 – -0.01)                 | 0.008 | <b>0.051</b> | 0.06 (0.03 – 0.09)    | <0.001 | <b>0.001</b> | 0.24 (0.14 – 0.33)     | <0.001 | <b>&lt;0.001</b> |
| APOE4 1 or 2 alleles (ref = 0 alleles)   | 0.00 (-0.02 – 0.03)          | 0.70  | 0.84       | -0.08 (-0.13 – -0.02) |       |            | -0.02 (-0.06 – 0.02)   | 0.387 | 0.67       | 0.01 (-0.02 – 0.03)                   | 0.586 | 0.80         | -0.04 (-0.07 – -0.01) | 0.019  | 0.10         | 0.01 (-0.09 – 0.10)    | 0.91   | 0.94             |
| Interaction: Male by 1 or 2 alleles      |                              |       |            | 0.07 (0.00 – 0.14)    | 0.046 | 0.14       |                        |       |            |                                       |       |              |                       |        |              |                        |        |                  |
| Observations                             | 527                          |       |            | 527                   |       |            | 527                    |       |            | 527                                   |       |              | 527                   |        |              | 527                    |        |                  |
| R <sup>2</sup> / adjusted R <sup>2</sup> | 0.011 / 0.004                |       |            | 0.036 / 0.026         |       |            | 0.019 / 0.012          |       |            | 0.008 / 0.000                         |       |              | 0.038 / 0.031         |        |              | 0.052 / 0.045          |        |                  |

**Table S4.** Linear regression results for all plasma variables investigated by sex and baseline diagnosis (CN, cognitively normal; LMCI, late mild cognitive impairment; AD, Alzheimer's disease). There were no significant interactions between diagnosis and sex.

| Predictors                               | Cortisol Cortisol ng/ml |        |              | C Reactive Protein ug/ml |       |              | CD 40 antigen ng/ml   |       |              | Interleukin 16 pg/ml  |       |              | Interleukin 3 ng/ml   |       |            |
|------------------------------------------|-------------------------|--------|--------------|--------------------------|-------|--------------|-----------------------|-------|--------------|-----------------------|-------|--------------|-----------------------|-------|------------|
|                                          | Estimates (CI)          | p      | adjusted p   | Estimates (CI)           | p     | adjusted p   | Estimates (CI)        | p     | adjusted p   | Estimates (CI)        | p     | adjusted p   | Estimates (CI)        | p     | adjusted p |
| (Intercept)                              | 2.09 (1.95 – 2.22)      |        |              | 0.33 (-0.21 – 0.88)      |       |              | -0.55 (-0.68 – -0.42) |       |              | 2.48 (2.31 – 2.65)    |       |              | -1.78 (-2.08 – -1.47) |       |            |
| AGE (years)                              | 0.00 (-0.00 – 0.00)     |        |              | 0.01 (0.00 – 0.01)       |       |              | 0.01 (0.00 – 0.01)    |       |              | 0.00 (0.00 – 0.00)    |       |              | 0.00 (-0.00 – 0.00)   |       |            |
| EDUCATION (years)                        | -0.00 (-0.00 – 0.00)    |        |              | -0.02 (-0.04 – -0.01)    |       |              | -0.00 (-0.00 – 0.00)  |       |              | -0.01 (-0.01 – -0.00) |       |              | 0.01 (0.00 – 0.02)    |       |            |
| Male (ref = Female)                      | 0.02 (-0.01 – 0.04)     | 0.18   | 0.44         | -0.12 (-0.21 – -0.03)    | 0.012 | <b>0.056</b> | -0.01 (-0.03 – 0.01)  | 0.38  | 0.59         | 0.01 (-0.02 – 0.04)   | 0.39  | 0.57         | -0.02 (-0.07 – 0.04)  | 0.56  | 0.75       |
| Diagnosis (ref = CN)                     |                         | 0.0009 | <b>0.010</b> |                          | 0.007 | <b>0.056</b> |                       | 0.016 | <b>0.067</b> |                       | 0.009 | <b>0.054</b> |                       | 0.044 | 0.17       |
| LMCI                                     | -0.02 (-0.07 – 0.02)    |        |              | -0.27 (-0.44 – -0.10)    |       |              | -0.02 (-0.06 – 0.02)  |       |              | -0.08 (-0.13 – -0.03) |       |              | -0.04 (-0.13 – 0.06)  |       |            |
| AD                                       | 0.03 (-0.02 – 0.08)     |        |              | -0.24 (-0.43 – -0.05)    |       |              | 0.02 (-0.02 – 0.07)   |       |              | -0.08 (-0.14 – -0.02) |       |              | -0.11 (-0.21 – -0.00) |       |            |
| Observations                             | 527                     |        |              | 526                      |       |              | 527                   |       |              | 526                   |       |              | 527                   |       |            |
| R <sup>2</sup> / adjusted R <sup>2</sup> | 0.034 / 0.024           |        |              | 0.061 / 0.052            |       |              | 0.131 / 0.123         |       |              | 0.048 / 0.039         |       |              | 0.022 / 0.013         |       |            |

**Table S4.** Continued

| Predictors                               | Interleukin 6 receptor ng/ml |       |            | Interleukin 8 pg/ml  |      |            | Immunoglobulin A mg/ml |      |            | Intercellular Adhesion Molecule ng/ml |       |              | Interleukin 18 pg/ml |        |              | Immunoglobulin E ng/ml |        |                  |
|------------------------------------------|------------------------------|-------|------------|----------------------|------|------------|------------------------|------|------------|---------------------------------------|-------|--------------|----------------------|--------|--------------|------------------------|--------|------------------|
|                                          | Estimates (CI)               | p     | adjusted p | Estimates (CI)       | p    | adjusted p | Estimates (CI)         | p    | adjusted p | Estimates (CI)                        | p     | adjusted p   | Estimates (CI)       | p      | adjusted p   | Estimates (CI)         | p      | adjusted p       |
| (Intercept)                              | 1.47 (1.33 – 1.61)           |       |            | 0.73 (0.54 – 0.93)   |      |            | 0.43 (0.20 – 0.67)     |      |            | 1.90 (1.75 – 2.05)                    |       |              | 2.33 (2.15 – 2.51)   |        |              | 1.44 (0.89 – 2.00)     |        |                  |
| AGE (years)                              | 0.00 (-0.00 – 0.00)          |       |            | 0.00 (0.00 – 0.01)   |      |            | 0.00 (-0.00 – 0.00)    |      |            | 0.00 (-0.00 – 0.00)                   |       |              | 0.00 (-0.00 – 0.00)  |        |              | 0.00 (-0.00 – 0.01)    |        |                  |
| EDUCATION (years)                        | -0.00 (-0.01 – 0.00)         |       |            | 0.00 (-0.00 – 0.01)  |      |            | -0.00 (-0.01 – 0.01)   |      |            | 0.00 (-0.00 – 0.01)                   |       |              | -0.00 (-0.01 – 0.00) |        |              | 0.01 (-0.01 – 0.02)    |        |                  |
| Male (ref = Female)                      | -0.02 (-0.05 – 0.00)         | 0.063 | 0.19       | -0.01 (-0.04 – 0.03) | 0.65 | 0.79       | 0.02 (-0.02 – 0.06)    | 0.42 | 0.59       | -0.03 (-0.06 – -0.01)                 | 0.011 | <b>0.056</b> | 0.06 (0.03 – 0.09)   | <0.001 | <b>0.004</b> | 0.24 (0.14 – 0.33)     | <0.001 | <b>&lt;0.001</b> |
| Diagnosis (ref = CN)                     |                              | 0.34  | 0.56       |                      | 0.11 | 0.30       |                        | 0.72 | 0.82       |                                       | 0.063 | 0.19         |                      | 0.32   | 0.56         |                        | 0.88   | 0.94             |
| LMCI                                     | -0.03 (-0.08 – 0.01)         |       |            | -0.04 (-0.10 – 0.02) |      |            | 0.03 (-0.05 – 0.10)    |      |            | -0.01 (-0.06 – 0.03)                  |       |              | 0.04 (-0.01 – 0.10)  |        |              | -0.00 (-0.18 – 0.17)   |        |                  |
| AD                                       | -0.03 (-0.08 – 0.02)         |       |            | -0.00 (-0.07 – 0.07) |      |            | 0.02 (-0.07 – 0.10)    |      |            | 0.02 (-0.03 – 0.08)                   |       |              | 0.03 (-0.03 – 0.10)  |        |              | -0.03 (-0.23 – 0.16)   |        |                  |
| Observations                             | 527                          |       |            | 527                  |      |            | 527                    |      |            | 527                                   |       |              | 527                  |        |              | 527                    |        |                  |
| R <sup>2</sup> / adjusted R <sup>2</sup> | 0.015 / 0.006                |       |            | 0.029 / 0.020        |      |            | 0.008 / -0.002         |      |            | 0.029 / 0.019                         |       |              | 0.032 / 0.023        |        |              | 0.053 / 0.043          |        |                  |

**Table S5.** Contingency table for the distribution of the APOE $\epsilon$ 4 alleles (0 or 1 and 2  $\epsilon$ 4 alleles) in each of the diagnosis groups (CN, cognitively normal; LMCI, late mild cognitive impairment; AD, Alzheimer's disease).

|                | <b>CN</b>   | <b>LMCI</b> | <b>AD</b>   |
|----------------|-------------|-------------|-------------|
| <b>0</b>       | 55 (74.32%) | 60 (43.48%) | 19( 28.36%) |
| <b>1 and 2</b> | 19 (25.68%) | 78 (56.52%) | 48 (71.64%) |
